1     **Structured and disordered regions of Ataxin-2 contribute differently to the specificity**  
2                     **and efficiency of mRNP granule formation.**

3

4     Arnas Petrauskas<sup>1\*</sup>, Daniel L. Fortunati<sup>1\*</sup>, Amanjot Singh<sup>2</sup>, Arvind Reddy Kandi<sup>5</sup>, Sai Shruti  
5     Pothapragada<sup>2</sup>, Khushboo Agrawal<sup>3,4</sup>, Joern Huelsmeier<sup>1</sup>, Jens Hillebrand<sup>1</sup>, Georgia Brown<sup>1</sup>,  
6             Dhananjay Chaturvedi<sup>2</sup>, Jongbo Lee<sup>6</sup>, Chunghun Lim<sup>6</sup>, Georg Auburger<sup>7</sup>, K.  
7             VijayRaghavan<sup>2</sup>, Mani Ramaswami<sup>1,2†</sup> and Baskar Bakthavachalu<sup>3,5†</sup>.

8             <sup>1</sup>Trinity College Institute of Neuroscience, School of Genetics and Microbiology,  
9     Smurfit Institute of Genetics and School of Natural Sciences, Trinity College Dublin,  
10    Dublin-2 Ireland. <sup>2</sup>National Centre for Biological Sciences, TIFR, Bangalore 560065,  
11    India. <sup>3</sup>Tata Institute for Genetics and Society Centre at inStem, Bellary Road,  
12    Bangalore 560065, India. <sup>4</sup>School of Biotechnology, Amrita Vishwa Vidyapeetham  
13    University, Kollam-690525, Kerala, India. <sup>5</sup>School of Basic Sciences, Indian Institute  
14    of Technology, Mandi 175005, India. <sup>6</sup>Department of Biological Sciences, Ulsan  
15    National Institute of Science and Technology (UNIST), 50 UNIST-gil, Ulsan 44919,  
16    Republic of Korea. <sup>7</sup>Experimental Neurology, Medical School, Goethe University,  
17    60590, Frankfurt, Germany.

18

19    \*These authors contributed equally to this work.

20

21    † **Correspondence:**

22    mani.ramaswami@tcd.ie; Phone +353 (1) 896 8400

23    baskar@iitmandi.ac.in; Phone +91-1905-267705

24

25

26    **Running Title:** Ataxin-2 PAM2:PABP interactions specify granule composition

27

28    **Keywords:** Ataxin-2, TRIBE, mRNA, PABP, Disordered Regions, Subcellular Organization,  
29    Stress Granule, Neurodegeneration, RNP Granule, *Drosophila*.

30

31 **ABSTRACT:**

32

33 Ataxin-2 (*ATXN2*) is a gene implicated in spinocerebellar ataxia type II  
34 (SCA2), amyotrophic lateral sclerosis (ALS) and Parkinsonism. The encoded protein is a  
35 therapeutic target for ALS and related conditions. *ATXN2* (or *Atx2* in insects) can function in  
36 translational activation, translational repression, mRNA stability and in the assembly of  
37 mRNP-granules, a process mediated by intrinsically disordered regions (IDRs). Previous work  
38 has shown that the LSm (Like-Sm) domain of *Atx2*, which can help stimulate mRNA  
39 translation, antagonizes mRNP-granule assembly. Here we advance these findings through a  
40 series of experiments on *Drosophila* and human Ataxin-2 proteins. Results of Targets of RNA-  
41 Binding Proteins Identified by Editing (TRIBE), co-localization and immunoprecipitation  
42 experiments indicate that a polyA-binding protein (PABP) interacting, PAM2 motif of Ataxin-  
43 2 may be a major determinant of the mRNA and protein content of Ataxin-2 mRNP  
44 granules. Transgenic experiments in *Drosophila* indicate that while the *Atx2*-LSm  
45 domain may protect against neurodegeneration, structured PAM2- and unstructured IDR-  
46 interactions both support *Atx2*-induced cytotoxicity. Taken together, the data lead to a proposal  
47 for how Ataxin-2 interactions are remodelled during translational control and how structured  
48 and non-structured interactions contribute differently to the specificity and efficiency of RNP  
49 granule condensation as well as to neurodegeneration.

50

51

## 52 INTRODUCTION:

53

54 mRNP granules are intriguing, dynamic membrane-less organelles containing translationally  
55 repressed mRNAs, RNA-binding proteins (RBPs), molecular chaperones and a variety of other  
56 cellular proteins (Buchan, 2014; Formicola *et al*, 2019; Kiebler & Bassell, 2006; Knowles *et*  
57 *al*, 1996; Martin & Ephrussi, 2009). The formation and composition of mRNP assemblies are  
58 determined by base-pairing interactions between mRNAs, protein-protein interactions and  
59 RBP-RNA interactions, whose respective contributions may vary across granule types and  
60 physiological states (Bevilacqua *et al*, 2022; Matheny *et al*, 2021; Van Treeck & Parker, 2018;  
61 Van Treeck *et al*, 2018). Stress granules (SGs) are particularly well-studied granules that form  
62 when cellular stress signals mediated by eIF2 $\alpha$  kinase activation (Kedersha *et al*, 1999) cause  
63 individual mRNPs to arrest in translation and condense into multi-mRNP assemblies (Ivanov  
64 *et al*, 2019; Kedersha & Anderson, 2007; Youn *et al*, 2019). Mutations in mRNP granule  
65 proteins, including TDP-43, FUS, Ataxin-2, hnRNPA1, hnRNPA2B1, EWSR1, have been  
66 associated with ALS and/or other forms of neurodegenerative disease (Cirulli *et al*, 2015;  
67 Couthouis *et al*, 2012; Elden *et al*, 2010; Ginsberg *et al*, 1998; Kim *et al*, 2013; Liu *et al*, 2017;  
68 Taylor *et al*, 2016; Wolozin & Ivanov, 2019). For this reason, and because TDP-43 and other  
69 stress-granule protein aggregates are components of protein inclusions found in ALS and  
70 Frontotemporal dementia (FTD), the regulation and cellular functions of stress granules have  
71 been topics of considerable fundamental and clinical interest (Cao *et al*, 2020; Li *et al*, 2013;  
72 Mallucci *et al*, 2020; Protter & Parker, 2016; Wang *et al*, 2020; Wheeler *et al*, 2016; Wolozin  
73 & Ivanov, 2019).

74

75 The cast of intermolecular interactions required for mRNP-granule assembly and the precise  
76 sequence with which they occur are not yet elucidated (Khong & Parker, 2020; Van Treeck &  
77 Parker, 2018). However, many studies show that intrinsically disordered regions (IDRs) found  
78 on mRNP-granule proteins contribute substantially to RNP granule assembly (Andrusiak *et al*,  
79 2019; Ash *et al*, 2021; Calabretta & Richard, 2015; Decker *et al*, 2007; Gilks *et al*, 2004;  
80 Järvelin *et al*, 2016; Kim *et al*, 2021; Yang *et al*, 2020). In biochemical experiments, such IDRs  
81 show the ability to phase separate into liquid-like assemblies (Babinchak & Surewicz, 2020;  
82 Han *et al*, 2012; Hyman *et al*, 2014; Kato *et al*, 2012; Lin *et al*, 2017; Murray *et al*, 2017;  
83 Murthy *et al*, 2019; Shin & Brangwynne, 2017; Strome & Wood, 1982; Toretzky & Wright,  
84 2014; Yang *et al.*, 2020) The accessibility or activities of IDRs can be tightly regulated by  
85 posttranslational modifications, allowing rapid physiological and spatial control over granule

86 assembly and disassembly (Ash *et al.*, 2021; Bah & Forman-Kay, 2016; Bah *et al.*, 2015;  
87 Berlow *et al.*, 2015; Hofweber & Dormann, 2019; Kwon *et al.*, 2013; Rayman *et al.*, 2018; Saito  
88 *et al.*, 2019; Yang *et al.*, 2020).

89

90 An important observation is that most IDRs also have the ability to transition from liquid-like  
91 states into solid, beta-sheet rich, amyloid-fibrils *in vitro*, particularly at high concentrations  
92 achieved in the liquid-phase (Alberti *et al.*, 2019; Li *et al.*, 2013; Murray *et al.*, 2017; Patel *et al.*  
93 *et al.*, 2015; Ramaswami *et al.*, 2013). This, and studies showing that inhibitors of eIF2 $\alpha$  kinase or  
94 downstream events including SG formation can be protective in animal models of  
95 neurodegenerative disease (Chou *et al.*, 2017; Halliday *et al.*, 2017; Sidrauski *et al.*, 2015; Wong  
96 *et al.*, 2018; Zyryanova *et al.*, 2021) have led to a conceptual framework in which: (a) mRNP  
97 granules provide a microenvironment where pathogenic protein seeds can form and grow  
98 (Bakthavachalu *et al.*, 2018; Mandrioli *et al.*, 2020; Patel *et al.*, 2015); (b) increased misfolded-  
99 protein loads result in inclusion formation, chronic stress signalling and reduced protein  
100 translation (Hetz *et al.*, 2020; Preissler & Ron, 2019); (c) increased demand on protein handling  
101 systems results in multiple cellular defects, notably in the functions of membrane-less  
102 organelles (Alberti *et al.*, 2017; Azkanaz *et al.*, 2019; Jiang *et al.*, 2020; Latonen, 2019; Schuller  
103 *et al.*, 2021). In particular, aberrant SG formation also results in nuclear transport defects which  
104 may contribute to cell death and toxicity (Hochberg-Laufer *et al.*, 2019; Zhang *et al.*, 2018).

105

106 Particularly strong support for the role of RNP granule formation in promoting disease comes  
107 from studies of Ataxin-2. Loss of Ataxin-2 is cytoprotective in yeast TDP-43 and *Drosophila*  
108 TDP-43 or C9ORF72 or Tau models of cytotoxicity (Bakthavachalu *et al.*, 2018; Becker *et al.*,  
109 2017; Elden *et al.*, 2010; Huelsmeier *et al.*, 2021; Kim *et al.*, 2014; Lee *et al.*, 2016; Shulman &  
110 Feany, 2003). In mouse models for SCA2 or ALS, either genetic loss of *ATXN2* or delivery of  
111 antisense oligonucleotides (ASOs) targeting *ATXN2* in the central nervous system, reduced  
112 aggregation of TDP-43, increased animal survival and improved motor function (Becker *et al.*,  
113 2017; Scoles *et al.*, 2017). These observations have led to ASOs against human *ATXN2* being  
114 developed and approved for clinical trials (Biogen, 2021).

115

116 Given Ataxin-2's therapeutic significance and multiple roles in biology, it is particularly  
117 important to determine which molecular activities of the protein are relevant to disease and to  
118 its various biological functions (Kim *et al.*, 2020). Across species, Ataxin-2 has three conserved  
119 regions: a Like-Sm (LSm) domain, an LSm-associated domain (LSm-AD) and a PAM2 motif,

120 which is flanked by extended intrinsically disordered regions (IDRs) (Boeynaems *et al.*, 2021).  
121 Detailed work in *Drosophila* has shown that a c-terminal IDR of Atx2 is selectively required  
122 for mRNP assembly into granules (Bakthavachalu *et al.*, 2018). Parallel experiments showing  
123 that the IDR is also required for cytotoxicity in *Drosophila* FUS, C9ORF72 and Huntington's  
124 disease models suggest RNP-granule formation to be a significant mechanism by which Atx2  
125 promotes neurodegeneration (Bakthavachalu *et al.*, 2018; Huelsmeier *et al.*, 2021). A recent  
126 discovery that the Atx2-LSm domain antagonizes IDR-function has led to a model in which  
127 the Atx2 cIDR: (a) does not support mRNP assembly when Atx2 is associated with actively  
128 translating mRNAs through Atx2-LSm domain interactions; (b) becomes accessible and active  
129 in mediating mRNP assembly when LSm-domain interactions break and mRNA translation  
130 stalls (Boeynaems *et al.*, 2021; Singh *et al.*, 2021).

131

132 We now present a series of experiments further elaborating mechanisms by Ataxin-2 functions  
133 in mRNA translation and mRNP assembly. These show that the PAM2 motif of Ataxin-2 and  
134 its interactions with PABP are not essential for granule assembly but are required to efficiently  
135 recruit Atx2-target mRNAs and specific protein components into Ataxin-2 granules. When  
136 taken together with other findings (Boeynaems *et al.*, 2021; Kim *et al.*, 2014; Satterfield &  
137 Pallanck, 2006; Singh *et al.*, 2021), our observations indicate that PAM2 binding to PABP on  
138 the polyA tail of mRNAs helps specify the composition of Ataxin-2 granules. We propose an  
139 early role for PAM2:PABP interactions working in coordination with the LSm domain to  
140 support mRNA translation and thereby oppose the mRNP formation (Boeynaems *et al.*, 2021);  
141 as well as a later role in escorting translationally-stalled PAM2:PABP linked mRNAs into  
142 mRNP granules. *In vivo* experiments analysing motor decline in transgenic *Drosophila* indicate  
143 that the PAM2:PABP interactions also support the progression of the neurodegenerative  
144 process. We provide new evidence for fresh insight into the enigmatic role of mRNP assembly  
145 in neurodegeneration.

146

## 147 **RESULTS:**

148

149 ***The structured PAM2 domain of Atx2 is necessary for the correct mRNA and protein content***  
150 ***of Atx2 granules.***

151

152 A recent eLife publication used Targets of RNA-Binding Proteins Identified by Editing  
153 (TRIBE) technology to identify mRNAs associated with Atx2 in the *Drosophila* adult brain

154 (Singh *et al.*, 2021). *In vivo*, the ability of an Atx2-fusion with ADARcd (the catalytic domain  
155 of an RNA-editing enzyme, ADAR), to edit a group of 256 target mRNAs was found to be  
156 dependent on the presence of the Atx2-cIDR, previously shown to be necessary for the  
157 formation of neuronal mRNP granules *in vivo*. In contrast, Atx2-ADARcd mutants lacking the  
158 LSM domain, both edited Atx2 TRIBE target RNAs and formed mRNP granules in cultured  
159 *Drosophila* S2 cells more efficiently than the wild-type. Thus, Atx2-ADARcd editing of target  
160 mRNAs occurs in and is reflective of mRNP granule assembly. While demonstrating a role for  
161 LSM-domain interactions in antagonizing cIDR mediated granule assembly, these observations  
162 did not address mechanisms by which Atx2 target mRNAs are selected, or whether and how  
163 Atx2 played any role in determining the composition of RNP granules. New experiments  
164 presented here address these outstanding questions.

165

166 Previous TRIBE analyses showed that LSM and LSM-AD regions have no major role in the  
167 recognition or selection of the Atx2-target mRNAs (Singh *et al.*, 2021). We therefore tested  
168 whether the third conserved region of Ataxin-2, a PAM2 motif known to associate with PABP  
169 (polyA binding protein), played any role in this process (Jiménez-López & Guzmán, 2014;  
170 Kaehler *et al.*, 2012).

171

172 We used Gal80<sup>ts</sup>-controlled *elav-Gal4* to express Atx2 $\Delta$ PAM2-ADARcd (deleted for the  
173 PAM2 motif) in brains of adult *Drosophila* for 5 days and used RNA-Seq to identify edited  
174 RNAs in polyA selected brain mRNA and compare it with Atx2-ADARcd using procedures  
175 described earlier (Figure 1A) (McMahon *et al.*, 2016). ADAR-edits, which converts Adenosine  
176 to Inosine on RNAs, are identified as A to G changes in TRIBE analyses. Each sample was  
177 sequenced to obtain 20 million reads (Supplementary table 1). The edits were only considered  
178 from the regions of the transcriptome that contained at least 20 reads. Genes with edits  
179 identified at a threshold above 15% in two biological replicates were considered as high-  
180 confidence true targets. We compared edit frequency and edited-gene identity in the brains of  
181 flies expressing Atx2 $\Delta$ PAM2-ADARcd with those in brains expressing Atx2-ADARcd.

182

183 In contrast to Atx-2 forms lacking LSM or LSM-AD domains (Singh *et al.*, 2021),  
184 Atx2 $\Delta$ PAM2-ADARcd edited significantly fewer RNA targets than wild-type Atx2-ADARcd  
185 (108 genes and 165 edits vs 256 genes and 317 edits, Figure 1B, C and Supplementary table  
186 2). More striking, the cohort of mRNAs edited by the  $\Delta$ PAM2 mutant form differed extensively  
187 from the largely overlapping cohorts edited by either wild-type forms of Atx2 (Figure 1C). Of

188 the 108 genes edited by Atx2 $\Delta$ PAM2-ADARcd, 36 were also targets of Atx2-ADARcd, the  
189 remaining 72 were unique. (Figure 1C, D and Supplementary table 2). 50 edit sites were  
190 common between the Atx2 $\Delta$ PAM2 and Atx2WT targets. Those sites were edited with much  
191 lower efficiency in Atx2 $\Delta$ PAM2 as compared to Atx2WT (Figure 1E).

192

193 The location of edits made by Atx2 $\Delta$ PAM2-ADARcd also differed dramatically as to where  
194 they occurred relative to the coding sequences of the target mRNAs (Figure 1F). While edits  
195 made by wild-type and  $\Delta$ LSm forms of Atx2-ADARcd were greatly enriched in the 3'UTR of  
196 the mRNAs, Atx2 $\Delta$ PAM2 targets were edited indiscriminately all along the mRNA length  
197 (Figure 1F).

198

199 Taken together, these data identify the PAM2 motif as necessary for Atx2 engagement with its  
200 correct mRNA targets. The PAM2 motif interacts with PABP, which binds polyA tracts at the  
201 3' end of mRNAs (Deo *et al.*, 1999). Therefore, the data point to a role for the structured  
202 PAM2:PABP interaction in guiding the association of Atx2 with mRNAs and for subsequent  
203 inclusion of these mRNAs in Atx2-containing granules.

204

205 If Atx2-ADARcd edits of target mRNAs occur predominantly in the mRNP granules (Singh *et al.*  
206 *et al.*, 2021), then the ability of Atx2 $\Delta$ PAM2-ADARcd to edit some target mRNAs would suggest  
207 that the PAM2 motif is not essential for mRNP granule formation *per se*. To examine this, we  
208 expressed wild-type and  $\Delta$ PAM2 mutant forms of GFP-tagged Atx2 under control of the native  
209 genomic promoter in *Drosophila* S2R<sup>+</sup> cells. Atx2 overexpression in S2 cells induced the  
210 formation of mRNP granules closely related to SGs, containing endogenous Atx2 and various  
211 SG proteins as previously reported (Figure 2A) (Bakthavachalu *et al.*, 2018; Singh *et al.*, 2021).  
212 Similar expression of Atx2 $\Delta$ PAM2-GFP also induced granule formation. However, these  
213 granules were compositionally distinct from those induced by Atx2-GFP. While they clearly  
214 contained some SG markers present on Atx2-granules, e.g., Me31B and Rox8 (*Drosophila*  
215 homologs of DDX6 and TIA1), they did not contain others such as PABP, Caprin and dFMRP  
216 (Figure 2B).

217

218 RNP-granules induced by expression of wild-type, LSm and PAM2 deficient forms of Atx2-  
219 GFP required the presence of the c-terminal IDR (Figure 2C). Thus, while largely dispensable  
220 for efficient mRNP assembly, the PAM2 domain plays a significant role in determining both  
221 mRNA and protein components of mRNP granules. One possibility is that the PAM2 motif

222 directly recruits PABP and associated mRNAs to granules and indirectly recruits other proteins  
 223 through their interactions with either PABP or mRNAs brought to RNP granules through Atx2-  
 224 PAM2:PABP interactions.

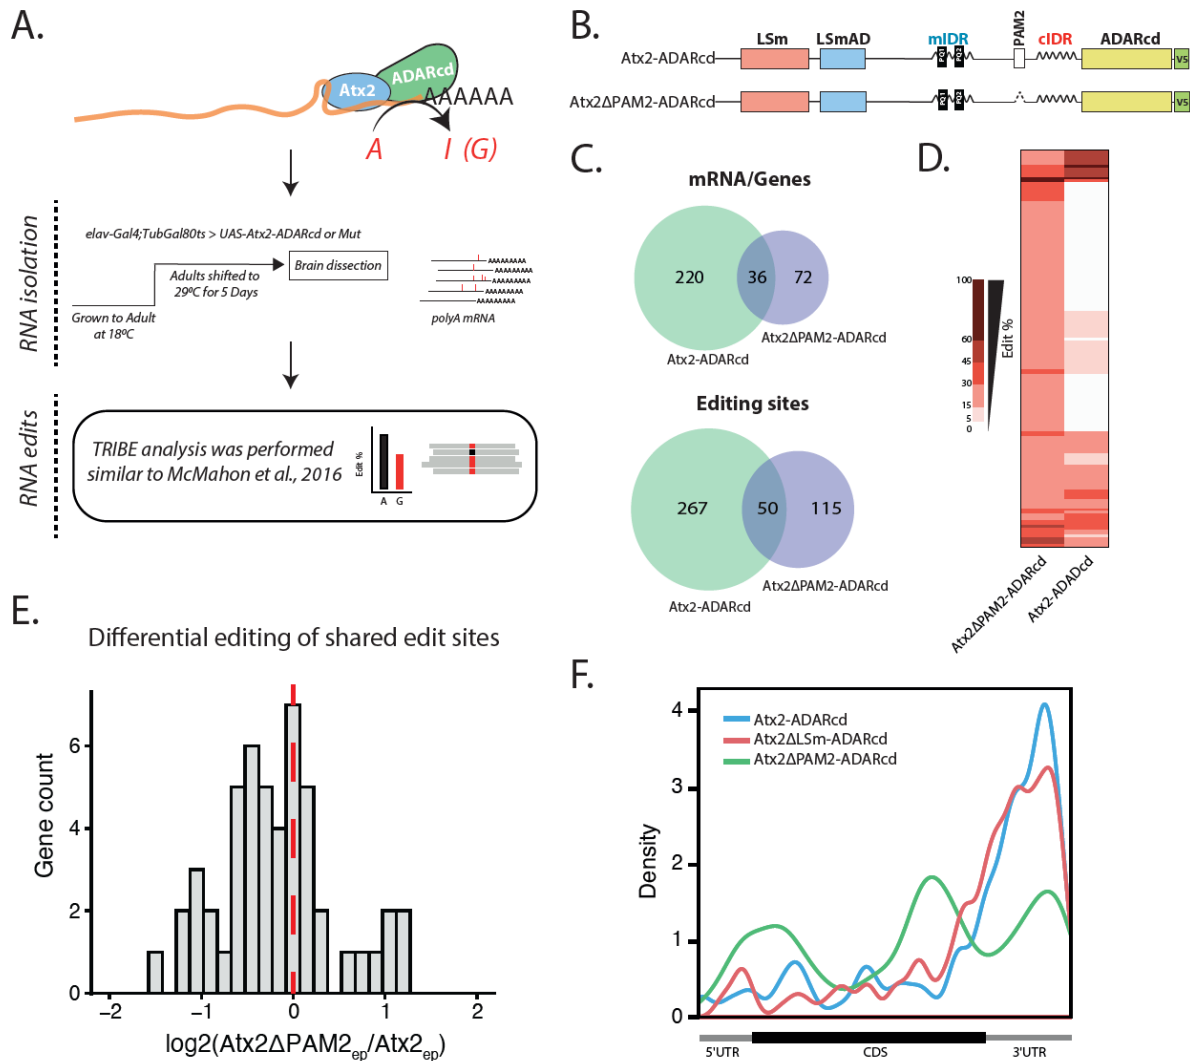

225

226

227

228

229

230

231

232

233

234

235

236

**Figure 1: The PAM2 domain facilitates the selection of Atx2 RNA targets.** (A). Flowchart depicting the TRIBES analyses pipeline. Atx2ΔPAM2-ADARcd was expressed in adult *Drosophila* brains. Total brain RNA was isolated and RNA edits were identified and compared to Atx2-ADARcd, similar to Singh et al 2021. (B) Domain map of Atx2-ADARcd constructs used for TRIBES analysis. (C) Comparisons of genes and edits identified by TRIBES between Atx2-ADARcd and Atx2ΔPAM2-ADARcd targets. (D) Most Atx2ΔPAM2 targets identified by TRIBES are unique and not edited in Atx2WT, suggesting that these new targets bound by Atx2ΔPAM2 are not native Ataxin-2 granule targets. (E) Comparisons of the editing efficiency ratio of common edits between Atx2WT vs Atx2ΔPAM2 show a much lower editing efficiency in Atx2ΔPAM2 compared to Atx2WT. (F) PAM2 deletion results in loss of 3'UTR specificity seen in Atx2WT and LSm deletion TRIBES target mRNAs. Atx2WT and Atx2ΔLSm-ADARcd data are extracted from (Singh et al 2021).



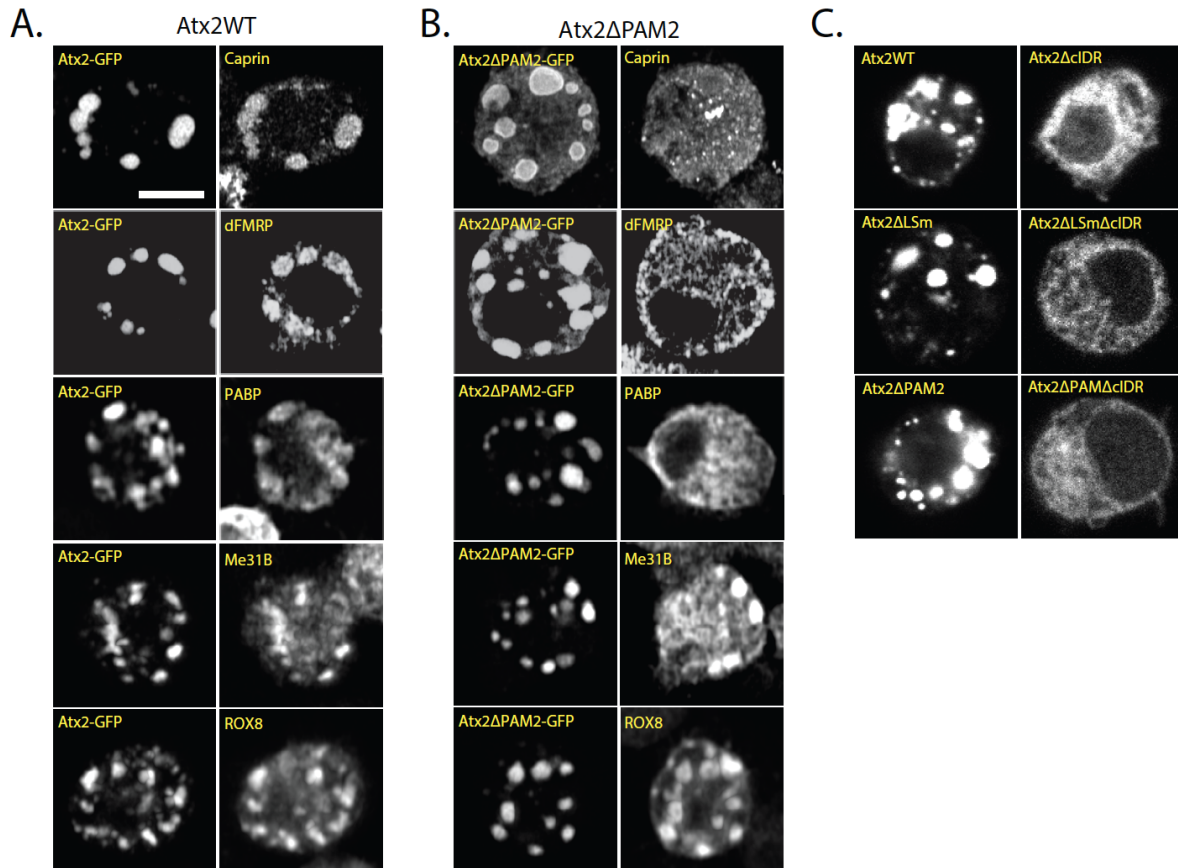

237  
238  
239  
240  
241  
242  
243  
244  
245  
246

**Figure 2: Presence of the PAM2 domain affects the protein composition of Atx2-GFP granules in S2 cells.** (A) Over-expression of Atx2-GFP in unstressed *Drosophila* S2 cells induces the formation of Atx2-GFP granules to which various SG markers co-localize. (B) Deletion of the PAM2 affects the Atx2-GFP granule composition. Over-expression of Atx2ΔPAM2-GFP in S2 cells still induces the formation of granules, but some SG markers fail to co-localize in these, notably dFMR, Caprin and PABP. (C) Atx2-GFP granule formation in S2 cells relies primarily on the cIDR. Deletion of the cIDR in Atx2WT, Atx2ΔPAM2 and Atx2ΔLSm, removes their ability to form granules upon overexpression. See Supplemental Figure 1, A-B, for quantification. The scale bar in (A) applies to (B) and (C). Scale bar = 5 μm,

247

### ***PAM2:PABP interactions are sufficient for Atx2 to associate with stress granules***

248 We wanted to directly confirm Ataxin-2 PAM2 motif interactions with PABP and analyse their  
249 relevance to RNP granule assembly. For this, we generated constructs encoding SNAP-epitope  
250 tagged variants of Atx2. These were radically truncated forms of *Drosophila* and human  
251 Ataxin-2 proteins containing only the LSM, LSM-AD and PAM2 elements and lacking all  
252 unstructured regions of the protein. The structured elements are connected via flexible linkers  
253 (Figure 3A). These “Mini-Ataxin-2” constructs and their domain-deleted forms allowed us to  
254 separate functions of the structured regions of Ataxin-2 from those of the remaining extended  
255

256 disordered regions. A similar approach has been previously shown for MeCP2 (Tillotson *et al*,  
257 2017). We identified key residues involved in *Drosophila* Atx2-PAM2:PABP interactions  
258 based on a previously solved crystal structure of a strongly conserved mammalian  
259 PAM2:PABPC1-MLLE domain complex (Kozlov *et al*, 2010; Xie *et al*, 2014) (Figure 3B).  
260 Residues leucine 914 and phenylalanine 921 (L914 and F921) in the human ATXN2-PAM2  
261 motif are predicted to contact the PABPC-MLLE domain and of these, F921 has been shown  
262 to be required for the PABPC-ATXN2 interaction (Inagaki *et al*, 2020). These residues (L859  
263 and F866, respectively) are perfectly conserved in fly Atx2 (Supplementary Figure 3). In order  
264 to allow more precise disruption of PAM2:PABP interactions and avoid potential unknown  
265 secondary effects of larger PAM2 motif deletions, we additionally generated mini Ataxin-2  
266 constructs where these PABP-contacting residues were singly or doubly altered to alanine. We  
267 used these constructs for co-immunoprecipitation (Figure 3) and co-localization (Figure 4)  
268 analyses to examine the contribution of PAM2:PABP/PABPC1 interactions in RNP-granule  
269 formation.

270

271 We expressed SNAP-tagged wild-type and mutant forms of mammalian and *Drosophila* mini-  
272 Ataxin-2 in HEK293T and S2 cells, respectively. We tested which Ataxin-2 domains were  
273 required for SNAP substrate beads to successfully immunoprecipitate Ataxin-2 complexes  
274 containing PABPC1/PABP from cell lysates (Figure 3C-E). Both LSM12 and PABPC1  
275 proteins were co-immunoprecipitated with mammalian mini-ATXN2. However, PABPC1 co-  
276 immunoprecipitation was selectively lost when the PAM2 domain was deleted or if predicted  
277 PABP-contact residues in the PAM2 domain were mutated (Figure 3C). Similar to the human  
278 homolog, fly mini-Atx2-SNAP also required the presence of its PAM2 motif with both  
279 predicted contact residues intact for immunoprecipitation of PABP from *Drosophila* S2 cell  
280 lysates (Figure 3D). Taken together with previous observations, these data support a potential  
281 sequence of molecular events. In unstressed cells, PAM2 domain interaction with PABP help  
282 position Ataxin-2 at the 3'-end of mRNAs while LSM-domain association with LSM12  
283 stimulate translation of these mRNAs; under stress conditions (or Ataxin-2 overexpression),  
284 translation is arrested and the cIDR domain freed to mediate interactions that facilitate the  
285 formation of condensed RNP granules (see Discussion)

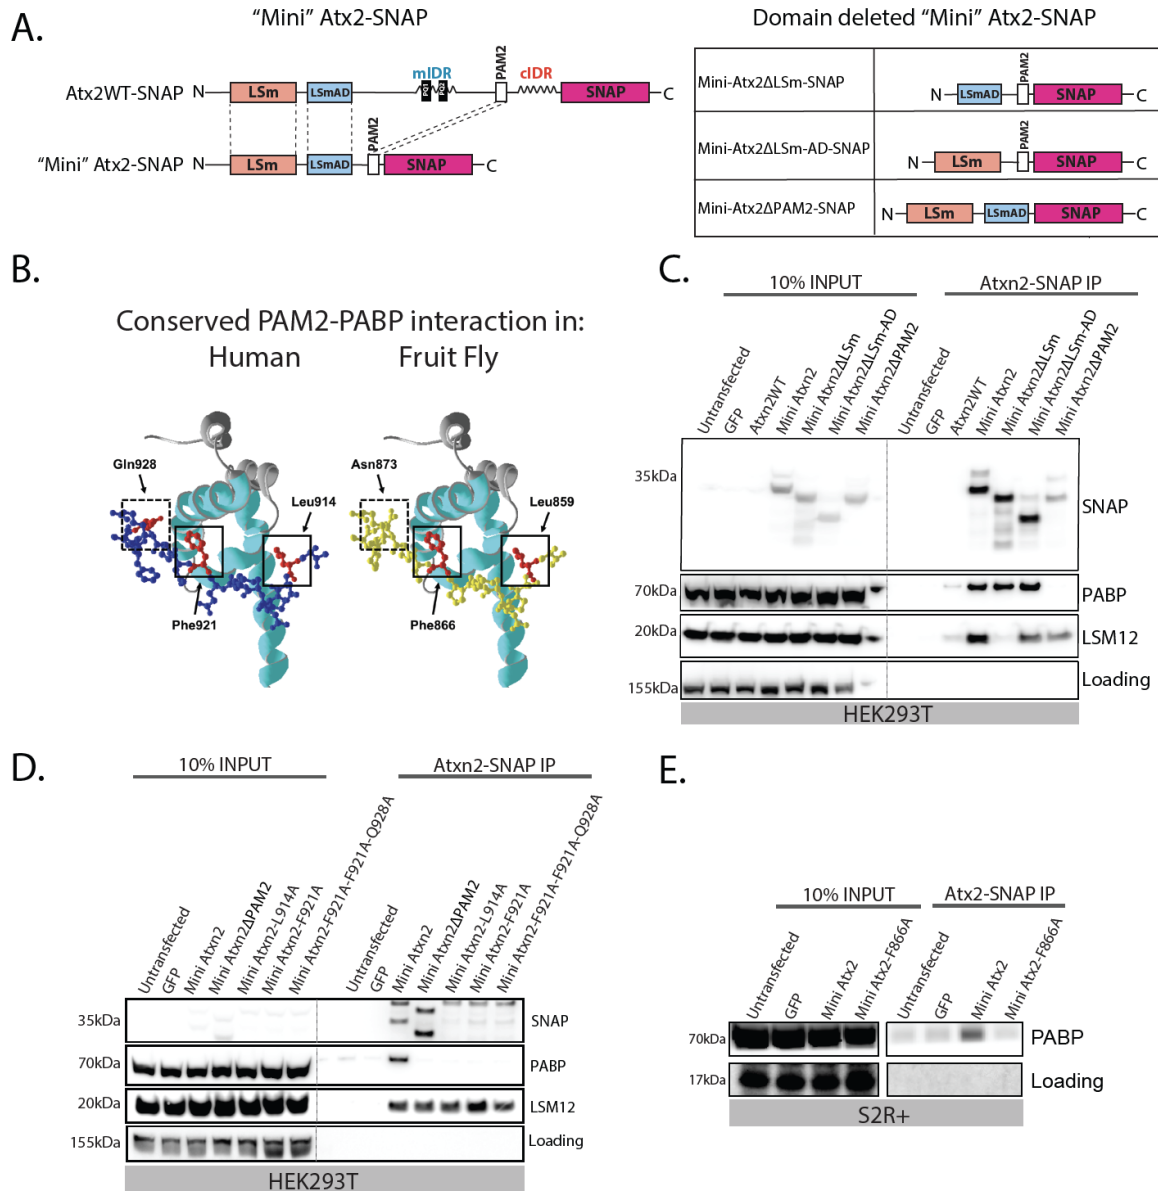

286

287

288

289

290

291

292

293

294

295

296

297

298

299

**Figure 3: A minimized Ataxin-2 construct containing only the known structured domains maintains the ability to interact with PABP and LSM12.** (A) Schematic of SNAP-tagged full length, minimal, and minimal domain-deleted constructs of fly Atx2 used to isolate the function of the structured domains of the protein without interference from IDR-mediated interactions. Human and *Drosophila* Ataxin-2 LSm, LSmAD and PAM2 domains show high amino acid sequence similarity (Clustal  $\Omega$ ) of 70%, 82% and 87% respectively. This suggests conserved and specific function of these structured domains. (B) Structural model of the PABP MLE domain (ribbon) showing the near-perfect structural similarity of the human ATXN2 PAM2 domain (blue, uniprot ID: Q99700) with the *Drosophila* Atx2 PAM2 domain (yellow, uniprot ID: Q8SWR8). The key interacting residues are highlighted in red. (C) Human minimized ATXN2 SNAP IP-WB from HEK293T cells probing for PABP and LSM12 showing the effects of different domain deletions. The PAM2 domain is necessary and sufficient for the ATXN2-PABP interaction, while the LSm domain is necessary and sufficient for the ATXN2-LSM12 interaction. (D) Point-mutations targeting key interacting residues of the PAM2 domain were predicted to replicate the

300 effect of a full PAM2 deletion in the minimized Atx2 construct. Human minimized ATXN2-SNAP IP  
301 WB from HEK293T cells showing that mutating either of the key hydrophobic residues L914 or F921 in  
302 the PAM2 domain is sufficient to prevent its interaction with PABP. The interaction with LSM12 is  
303 unaffected by the point mutations. (E) *Drosophila* minimized Atx2-SNAP IP-WB from S2 cells. An  
304 analogous PAM2 domain point mutation on F866 blocks the Atx2-PABP interaction.

305

306 Single mRNAs usually associate with multiple PABP molecules because their polyA tails are  
307 considerably longer than the ~24 bases required for PABP binding (Mangus *et al*, 2003). Thus,  
308 in cells expressing endogenous and mini Ataxin-2, mRNAs could have both forms associated  
309 with their polyA tails. In response to stress, mini Ataxin-2 would be expected to move into SGs  
310 whose formation is facilitated by IDRs on endogenous Ataxin-2 associated with the common  
311 target RNAs. We examined this possibility in cells before and after oxidative stress.

312

313 *Drosophila* and human mini-Ataxin-2-SNAP, expressed in fly S2 or human U2OS cells  
314 respectively, were diffusely localized in the cytoplasm and neither induced formation of  
315 Ataxin-2 foci. However, when cells were exposed to sodium arsenite to induce SG formation,  
316 SNAP-tagged mini-Atx2 (Figure 4A) and mini- ATXN2 (Figure 4H) were robustly recruited  
317 to stress granules. Thus, association of Ataxin-2 with mRNP-granule components may be  
318 achieved by structured domain interactions alone, independently of IDRs required for mRNP  
319 assembly into granules.

320

321 Further experiments examined which of the LSm, LSm-AD and/or PAM2 domains were  
322 necessary for mini-Ataxin-2 to associate with stress granules. Mammalian and *Drosophila*  
323 mini-Ataxin-2 forms missing the LSm or LSm-AD domains could still be found in stress  
324 granules (Figure 4B-C and I-J). In contrast, mutants lacking the PAM2 domain remained  
325 cytoplasmic after stress in both S2 (Figure 4D) and U2OS cells (Figure 4K). Notably, point  
326 mutations in the Ataxin-2-PAM2 domain that specifically disrupt PAM2:PABP interaction  
327 similarly prevent localization to stress granules (Figure 4E-G and L-N). Thus, interactions  
328 between Ataxin-2's PAM2 domain and PABP appear important for the presence of Ataxin-2  
329 in native mRNP granules, whose assembly is driven by the distinct (IDR) region of the protein  
330 (Figure 2C). The ability of otherwise full-length Ataxin-2 lacking PAM2 to form  
331 compositionally distinct mRNP assemblies (Figure 2B) suggests that PAM2:PABP binding  
332 also serves to limit non-physiological interactions by Ataxin-2 (See Discussion).

333

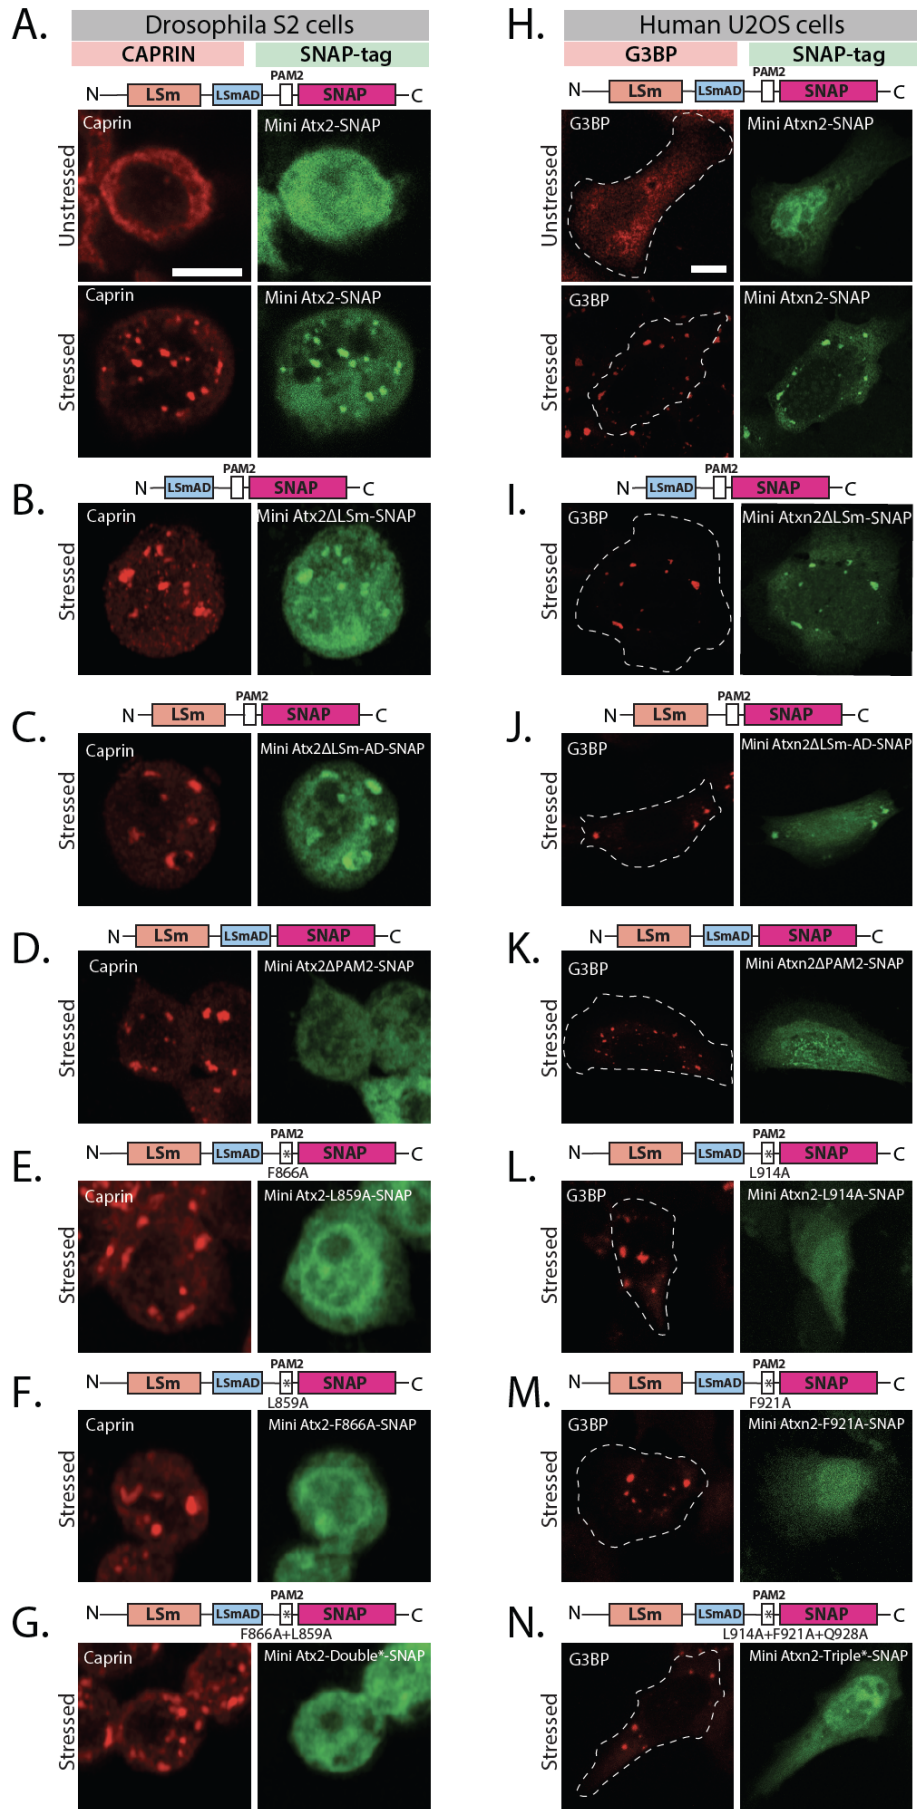

335 **Figure 4: The structured PAM2 domain is necessary and sufficient for Ataxin-2 recruitment to Stress**  
336 **Granules in both *Drosophila* and human cells.** (A) In *Drosophila* S2 cells mini-Atx2-SNAP (green) is  
337 recruited to SGs induced by arsenite. (B) Deletion of LSm or (C) LSm-AD domains has no significant  
338 effect in the arsenite-induced SG recruitment. (D) The presence of PAM2 domain, and specifically its key  
339 PABP-interacting amino acids (E-G), is necessary for Atx2 recruitment to SGs. Caprin (red) was used as  
340 SG granule marker, scale bar = 5  $\mu\text{m}$ , (H) Human mini-ATXN2-SNAP (green) is recruited to arsenite-  
341 induced SGs in human U2OS cells. (I) Deletion of LSm or (J) LSm-AD domains has no effect on the  
342 arsenite-induced SG recruitment of ATXN2. (K) Deletion of the PAM2 domain, and specifically its  
343 PABP-interacting amino acids (L-N), are necessary for ATXN2 recruitment to SGs. G3BP1 (red) was  
344 used as SG marker; scale bar = 10  $\mu\text{m}$ . Schematics above images indicate the domain deletions or amino  
345 acid mutations that were made in the different Ataxin-2 constructs. See Supplemental Figure 1C for  
346 quantification.

347

348 ***The IDR and PAM2 domains promote and the LSm domain inhibits cytotoxicity in***  
349 ***Drosophila neurodegeneration models.***

350

351 Three different Ataxin-2 domain deletions tested showed three distinct effects on mRNP  
352 granule assembly in S2 cells. IDR domain deletions prevent Ataxin-2 granule formation. LSm-  
353 domain deletion enhances the formation of Ataxin-2 granules. PAM2 domain deletions result  
354 in the formation of unusual mRNP assemblies (Bakthavachalu *et al.*, 2018; Singh *et al.*, 2021)  
355 (Figure 2B/C). Prior observations showing that Atx2 IDR deletions suppress cytotoxicity in  
356 *Drosophila* models for neurodegeneration indicate that mRNP granules support events that  
357 lead to degenerative disease (Bakthavachalu *et al.*, 2018; Becker *et al.*, 2017; Huelsmeier *et*  
358 *al.*, 2021; Scoles *et al.*, 2017). If true, the expression of Atx2 $\Delta$ LSm, which enhances granule  
359 assembly, would promote or potentially accelerate the degeneration, while the expression of  
360 Atx2 $\Delta$ cIDR would not. The expression of Atx2 $\Delta$ PAM2 would be expected to support mRNP  
361 assemblies of different compositions from the ones containing wild-type or  $\Delta$ LSm forms of  
362 Atx2. The effects on degeneration for this condition would be hard to predict.

363

364 To examine how the different Atx-2 domain deletions affect nervous system integrity and  
365 function over time, we combined a Gal4-responsive *UAS-Atx2* transgene with *elav-Gal4* and  
366 *TubGal80<sup>ts</sup>*. This allows us to use a temperature shift from 18°C to 30°C to induce *UAS-Atx2*  
367 transgene expression, specifically in the brains of adult flies (Figure 5A). We then analysed the  
368 rate at which flies climbed the walls of a glass cylinder, a surrogate measure of motor ability,  
369 one day and 15 days after transgene expression. All genotypes tested showed robust and

370 comparable levels of climbing ability on day 1. Interesting variations were identified on day  
371 15. The 15-day old flies expressing Atx2WT or Atx2 $\Delta$ LSm showed a strong decline in  
372 climbing ability. In contrast, Atx2  $\Delta$ cIDR flies showed a minimal decline (Figure 5B). These  
373 observations were in line with the effects of these Atx2 types on granule formation. Strikingly,  
374 flies expressing the Atx2 $\Delta$ PAM variant, which formed compositionally distinct granules in S2  
375 cells, showed no significant decline in climbing ability, suggesting that Atx2's ability to  
376 promote progressive decline of neural function depends less on Atx2 granule formation and  
377 aggregation, but a bit more on its sequestration of critical translation factors such as PABP (and  
378 associated RNAs.(Figure 5B). These observations support and extend prior work showing that  
379 heterologous overexpression of full-length, but not PAM2-domain deleted forms of  
380 mammalian ATXN2 enhances mammalian TDP-43-induced degeneration of the *Drosophila*  
381 compound eye (Kim *et al.*, 2014). They are also consistent with work in mice showing that  
382 PABPC1 sequestration in inclusions correlates strongly with the progression of  
383 neurodegeneration (Damrath *et al.*, 2012).

384

385 The conclusion, that PAM2 mediated interactions were required for progressive cytotoxicity,  
386 is further supported by a parallel series of experiments in which we used *mef2-Gal4* in place  
387 of *elav-Gal4*, to target *UAS-Atx2* transgene expression to *Drosophila* adult muscles (Figure  
388 5C). Micro-computed tomography (micro-CT) scanning to visualize the integrity of flight  
389 muscle fibers in whole-mount preparations (see Methods) revealed degeneration of muscles  
390 expressing wild-type Atx2 in 20-day old flies. While there was more severe degeneration in  
391 Atx2 $\Delta$ LSm expressing muscle, muscles similarly expressing Atx2 $\Delta$ cIDR or Atx2 $\Delta$ PAM forms  
392 showed no morphological defects (Figure 5C and Supplementary Figure 4).

A.

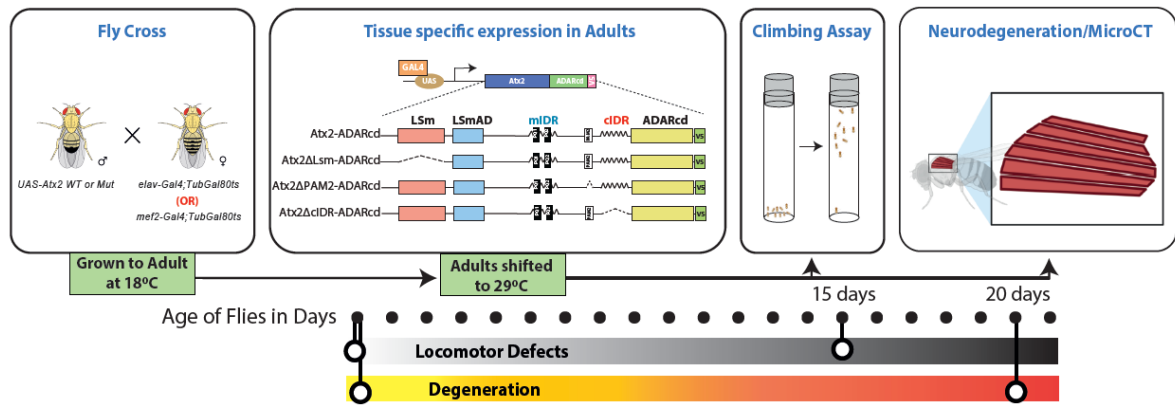

B.

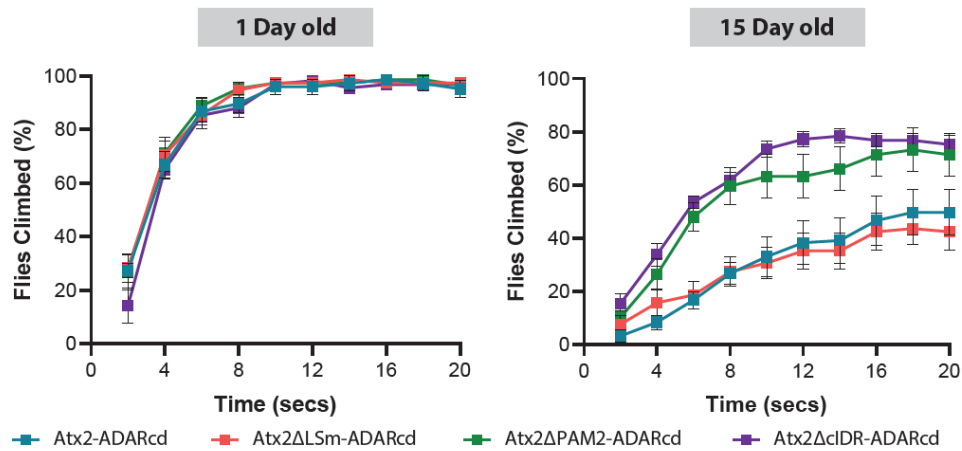

C.

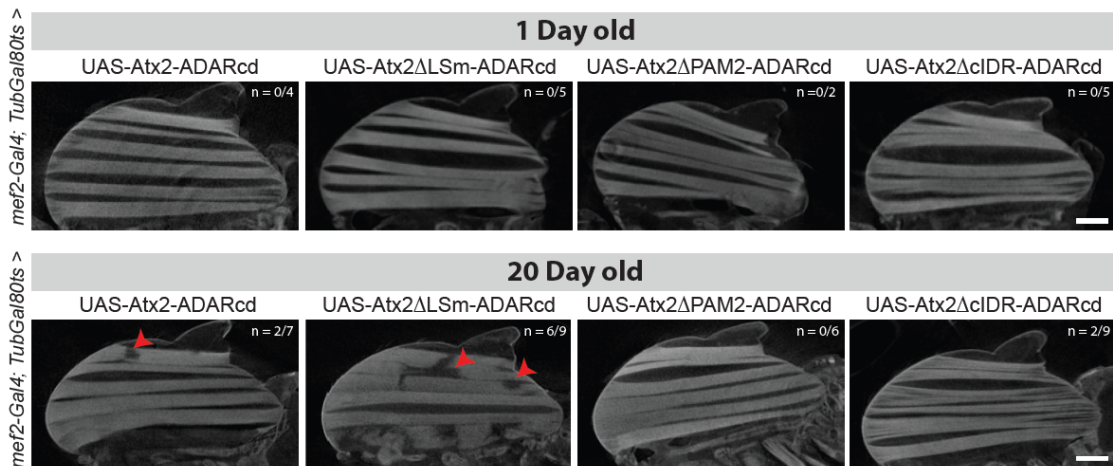

393

394

395

396

397

398

399

400

401

**Figure 5: The IDR and PAM2 domains promote and the LSm domain inhibits neurodegeneration in *Drosophila*.** (A) A schematic of the experimental design is shown. UAS-transgenes were crossed with *elav-Gal4; tub-Gal80<sup>ts</sup>* or *mef2-Gal4, tub-Gal80<sup>ts</sup>* and kept at 18°C till the adult flies emerged. The flies were shifted to 29 °C for days shown with dots under the experimental design. Fly climbing or indirect flight muscle cytotoxicity was studied. (B) *Drosophila* climbing behavior assay was performed by driving UAS-transgene (Atx2WT, Atx2ΔcIDR, Atx2ΔPAM or Atx2ΔLSm) with *elav-Gal4*. A graph was plotted with number of flies (Y-axis) that crossed the 20ml mark at a given time (X-axis). (C) Cellular toxicity was measured by driving UAS-transgene (Atx2WT, Atx2ΔcIDR, Atx2ΔPAM or Atx2ΔLSm) with *mef2-*



402 *Gal4*. Fly indirect flight muscles were imaged using micro-CT and the loss of muscle fibers is shown with  
403 solid red arrowheads.

404

## 405 **DISCUSSION**

406 The results described above provide three significant lines of insight. First, they support a  
407 detailed model for sequential protein-protein interactions through which Ataxin-2 can  
408 modulate different translational states of a single mRNA. Second, they show that the Ataxin-2  
409 polypeptide contains distinct activities that promote or protect against neurodegeneration,  
410 pointing to the value of developing therapeutics that target specific Ataxin-2 interactions,  
411 beyond those that reduce overall levels of the protein. Third, the work identifies a novel  
412 molecular mechanism involving the PAM2 domain and PABP that contributes to the assembly  
413 of mRNP granules.

414

### 415 **Molecular mechanisms of Ataxin-2 function**

416 Some RNA-binding proteins can remain associated with mRNAs across multiple stages: RNA  
417 processing, transport, translation, or translational control (Formicola *et al.*, 2019; Gomes &  
418 Shorter, 2019; Hachet & Ephrussi, 2004; Harlen & Churchman, 2017; Lin *et al.*, 2015; Maniatis  
419 & Reed, 2002). Ataxin-2 may be one such protein. It is a translational activator of the  
420 *Drosophila period* mRNA, a repressor of several miRNA reporters, a facilitator of neuronal  
421 mRNP-granule and stress-granule formation as well as a broad stabilizer of Ataxin-2 associated  
422 mRNAs (Bakthavachalu *et al.*, 2018; Inagaki *et al.*, 2020; Lim & Allada, 2013; McCann *et al.*,  
423 2011; Nonhoff *et al.*, 2007; Sudhakaran *et al.*, 2014; Yokoshi *et al.*, 2014; Zhang *et al.*, 2013).  
424 While these different functions could represent different modes of engagement with distinct  
425 sets of mRNAs, the data are also consistent with another model. Sequential interactions  
426 mediated by different protein regions during mRNP modelling allow Ataxin-2 to contribute in  
427 multiple ways to translational control to a single mRNA.

428

429 Previous work has shown that *Atx-2* enhances *period* mRNA translation through a mechanism  
430 requiring LSm-domain interactions with a complex of LSM12 and TYF (Twenty Four) proteins  
431 associated with the 5' cap of the translating mRNA (Lee *et al.*, 2017; Lim & Allada, 2013; Zhang  
432 *et al.*, 2013). Given considerable supportive evidence for direct binding between the LSm-  
433 domain and LSM12, we postulate that LSm-domain-LSM12 interactions occur in translating  
434 polysomes (Satterfield & Pallanck, 2006) and contribute to increased efficiency of translation.

435 This proposal is consistent with the observation that the LSm domain opposes the formation of  
436 mRNP granules, which usually contain translationally repressed mRNAs (Singh *et al.*, 2021).

437

438 However, the LSm domain must also contribute to LSM12-independent functions, because  
439 while LSm-domain deletions from *Drosophila* Atx2 cause lethality and LSM12 null mutants,  
440 while arrhythmic, are viable and fertile (Lee *et al.*, 2017). One possibility is that LSm domains  
441 additionally contribute, perhaps indirectly, to interactions with the DEAD-box helicase  
442 Me31B/DDX6 in a translational repressor complex (Brandmann *et al.*, 2018; Lee *et al.*, 2017).  
443 Thus, we suggest that in the case of actively translating mRNAs, the Atx2 function is driven  
444 by LSm-domain association with LSM12 and translational initiators, and that LSM12  
445 disengages from a translational initiation complex as the mRNA transitions into a repressed  
446 state driven by Me31B.

447

448 While polyA tails and PABP are known to support translation and the Ataxin-2 PAM2 domain  
449 is involved in targeting the protein to polysomes (Satterfield and Pallanck, 2006), existing data  
450 do not directly address how Ataxin-2 PAM2 motif interactions contribute to translational  
451 activation. One possibility, supported by observations on the *period* mRNA is that the PAM2-  
452 domain guides Ataxin-2 to the 3'UTR of its target mRNAs (Lim & Allada, 2013). Our  
453 observation that PABP co-immunoprecipitates with mini-Ataxin2, show that Atx2-  
454 PAM2:PABP interactions occur independently of and prior to mRNP granule formation.  
455 Recent findings that this association antagonizes the Ataxin-2 condensation (Boeynaems *et al.*,  
456 2021) are consistent with a model in which the Atx2-PAM2 motif interacts with PABP in  
457 translating mRNAs to support efficient translation driven by the LSm-LSM12 complex.  
458 However, in addition to supporting translation, PABP is also known to associate with  
459 translational repressors that could drive either mRNA deadenylation and/or storage (Machida  
460 *et al.*, 2018; Yoshida *et al.*, 2006). Our data support such a dual role for Ataxin-2 associated  
461 with PABP in translational repression. First, when Ataxin-2 target mRNAs are not actively  
462 translated, then the mRNP through Me31B/DDX6 and PABP may recruit deadenylases to  
463 transition into either a translationally dormant or degradative state (Lee *et al.*, 2017; Machida  
464 *et al.*, 2018; Yi *et al.*, 2018; Yoshida *et al.*, 2006). Second, Atx2 associated mRNA may move  
465 into mRNP granules whose formation is facilitated by Atx2 IDR-mediated condensation. We  
466 postulate that mRNAs in such assemblies are stored in a form that is protected from  
467 degradation. While the above model, shown in Figure 6, is consistent with all our data, we

468 acknowledge that it needs extensive and rigorous testing in the context of the life cycle of a  
469 single Ataxin-2 target mRNA.

470

### 471 **Implications for Ataxin-2 as a therapeutic target**

472 Antisense Oligonucleotide (ASO) based therapeutic strategies that lower levels of Atxn-2 are  
473 being developed for the treatment of ALS and spinocerebellar ataxia type 2 (SCA2) (Becker *et*  
474 *al.*, 2017; Scoles *et al.*, 2017). Our experiments provide a much finer grained analysis of  
475 activities of Ataxin-2, suggesting that the function of the LSm domain should be spared, and  
476 that IDR mediated assembly mechanisms and perhaps PAM2:PABP interactions should be  
477 most usefully targeted by therapeutics.

478

479 Our previous work showed that *Atx2* mutants lacking the cIDR required for Ataxin-2 granule  
480 formation in *Drosophila* neurons and S2 cells, were resistant to neurodegeneration as assessed  
481 in *Drosophila* disease models (Bakthavachalu *et al.*, 2018; Huelsmeier *et al.*, 2021). We further  
482 showed that the LSm-domain antagonizes Ataxin-2 granule formation (Singh *et al.*, 2021). Here  
483 we advance the latter observation by demonstrating that Ataxin-2 forms lacking the LSm  
484 domain may more effectively cause cytotoxicity than the wild-type or IDR-deficient forms  
485 (Figure 5C). These observations independently confirm our original conclusions and-provide  
486 further support for a model in which the efficiency of mRNP assembly correlates with the speed  
487 and severity of neurodegenerative processes in *Drosophila*.

488

489 The importance of the PAM2 domain in promoting degeneration has been previously observed  
490 by experiments showing that heterologous expression of a pathogenic form of human Ataxin-  
491 2 lacking its PAM2 domain, but not the full-length form, suppresses cytotoxicity in *Drosophila*  
492 expressing human TDP-43 (Kim *et al.*, 2014). Our observations that expression of  
493 *Atx2* $\Delta$ PAM2 is far less toxic than expression of wild-type *Atx2* is consistent with this. In  
494 addition, by showing that *Atx2* $\Delta$ PAM2 forms compositionally different Ataxin-2 granules,  
495 they highlight the importance of specific granule components, and not granules *per se*, in  
496 neurodegenerative pathologies. Thus, while liquid-liquid transitions mediated by disordered  
497 domains could be a shared requirement for the formation of multiple types of mRNP granules,  
498 we speculate that each granule type, with distinctive composition, could preferentially support  
499 one or other type of proteinopathy (De Graeve & Besse, 2018; Vogler *et al.*, 2018).

500

### 501 **Structured interactions may determine mRNP granule composition.**

502 Many lines of evidence argue that specific molecular interactions, e.g. mediated by structured  
503 domains of the P-body component Edc3 or the stress-granule components G3BP and Caprin,  
504 contribute to the mRNP granule formation (Decker *et al.*, 2007; Kedersha *et al.*, 2016). In  
505 engineered systems, the condensation of RNA-binding proteins and mRNAs into granules has  
506 been clearly shown to depend on both traditional protein-protein interactions and on more  
507 promiscuous interactions between intrinsically disordered regions (Protter *et al.*, 2018). Our  
508 work now identifies the interactions between Ataxin-2's PAM2 motif and PABP as a critical  
509 contributor to the assembly of Ataxin-2 containing mRNP granules. This suggests a mechanism  
510 by which the interaction helps select mRNA and protein components of mRNP granules.

511

512 We suggest that Ataxin-2, guided by PAM2:PABP interactions and LSm domain interactions,  
513 recruits target mRNAs and associated proteins into translating mRNPs (Satterfield & Pallanck,  
514 2006). Under conditions where the translation is arrested, LSm-domain interactions are altered  
515 (Lee *et al.*, 2017), and transcripts are released from stalled ribosomes. Base-pairing interactions  
516 between exposed mRNA side chains, as well as interactions between Ataxin-2's now  
517 accessible intrinsically disordered regions, contribute to the assembly of these mRNPs into  
518 granules. This logical sequence of events is consistent with: (a) TRIBE data showing a reduced  
519 number of edits of native Ataxin-2 target mRNAs by Atx2 $\Delta$ PAM2-ADARcd; (b) the inability  
520 of  $\Delta$ PAM2-miniAtx2 constructs to associate with stress granules; and (c) the aberrant protein  
521 composition of granules induced by Atx2 $\Delta$ PAM2 in S2 cells. The additional observation that  
522 Atx2 $\Delta$ PAM2-ADARcd expression results in a large number of non-native mRNA edits,  
523 indicates that the PAM2:PABP interaction not only selects correct target mRNAs but also  
524 prevents Ataxin-2 engagement with incorrect mRNA target regions.

525

526 Our conclusion that Ataxin2-PAM2:PABP interactions are involved in the selection of mRNA  
527 components of RNP granules is superficially inconsistent with the observation that RNA  
528 components of native stress granules can be predicted with remarkable accuracy on the basis  
529 of mRNA size. This argues for a primary role for RNA-RNA interactions in the stress granule  
530 assembly (Jain & Vale, 2017; Matheny *et al.*, 2021; Van Treeck & Parker, 2018). However,  
531 we note that experiments presented here do not address mechanisms by which mRNAs are  
532 selected into stress granules. Instead, the TRIBE data address how Atx2-target mRNAs are  
533 selected into neuronal mRNP granules that exist in non-stressed cells *in vivo*, and microscopic  
534 studies analyse protein components of mRNP granules formed following Atx2 expression in  
535 S2 cells. Our experiments and observations therefore point to fundamental differences in

536 mechanisms by which the assembly of neuronal granules, or granule types found in unstressed  
 537 cells, may differ from those involved in stress-granule assembly. The regulation and  
 538 composition of the former class could well rely extensively on specific protein-protein and  
 539 protein-mRNA interactions, which may be revealed by future analyses of mechanisms by  
 540 which such mRNP assemblies are formed *in vivo*.  
 541

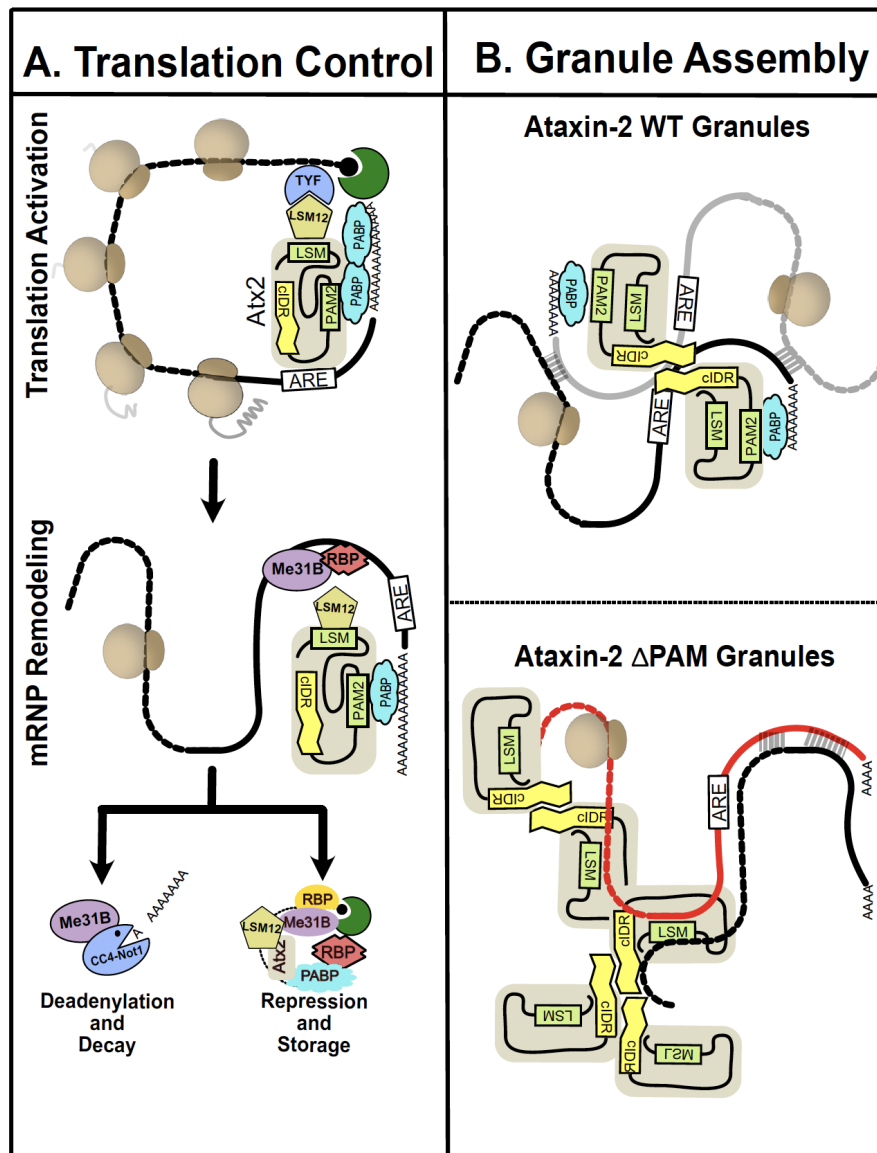

542  
 543  
 544 **Figure 6: A model for Ataxin-2 RNP dynamics and the role of PAM2 domain in determining its RNP**  
 545 **composition and mRNA selection.** (A) Ataxin-2 is recruited to mRNAs by RBPs during different stages  
 546 of the mRNA life cycle. Ataxin-2 activates translation of subsets of mRNA by recruiting LSM12, TYF and  
 547 other translation activation complexes. Under specific conditions, mRNP remodelling exposes Ataxin-2  
 548 cIDR that mediates multivalent interactions and RNP granule assembly. Ataxin-2 recruits Me31B and  
 549 CCR4-NOT1 complexes that lead to deadenylation and/or translation repression. It is possible that  
 550 LSM12/TYF continue to associate with RNA but are probably not part of repressor complexes. RNA

551 deadenylation can lead to degradation or translation repression and storage in RNP granules. (B) Ataxin-  
552 2-PAM2 domain determines protein and RNA partners of the RNP granules. PAM2 domain is essential for  
553 recruitment of Ataxin-2 to stress granules that also contains other RBPs (eg. Me31B, FMRP, Rox8, Rin  
554 and Caprin). Ataxin-2-cIDR along with RNA-RNA interaction stabilise the stress induces RNP  
555 condensation. In the absence of the PAM2 domain, Ataxin-2 fails to recruit specific target mRNA and  
556 proteins. Remodelling of Ataxin-2 exposes the cIDR to induce phase separation and aberrant RNP  
557 condensation. The Ataxin-2 $\Delta$ PAM2 granules are non-toxic and lack several known stress granule proteins  
558 (eg.FMRP, Caprin and PABP).  
559

560 **Materials and methods**

561

562 Key resources table

563

| Reagent type (species) or resource                 | Designation                                                        | Source or reference                        | Identifiers         | Additional information                             |
|----------------------------------------------------|--------------------------------------------------------------------|--------------------------------------------|---------------------|----------------------------------------------------|
| Genetic reagent ( <i>Drosophila melanogaster</i> ) | <i>UAS-Atx2-WT-ADARcd</i>                                          | Singh <i>et al.</i> 2021                   | N/A                 |                                                    |
| Genetic reagent ( <i>Drosophila melanogaster</i> ) | <i>UAS-Atx2-ΔLSm-ADARcd</i>                                        | Singh <i>et al.</i> 2021                   | N/A                 |                                                    |
| Genetic reagent ( <i>Drosophila melanogaster</i> ) | ( <i>UAS-Atx2-ΔPAM2-ADARcd</i> )                                   | This paper                                 | N/A                 |                                                    |
| Genetic reagent ( <i>Drosophila melanogaster</i> ) | <i>UAS-Atx2-ΔcIDR-ADARcd</i>                                       | Singh <i>et al.</i> 2021                   | N/A                 |                                                    |
| Genetic reagent ( <i>Drosophila melanogaster</i> ) | <i>UAS-Atx2-only LSm/Lsm-AD-ADARcd</i>                             | Singh <i>et al.</i> 2021                   | N/A                 |                                                    |
| Genetic reagent ( <i>Drosophila melanogaster</i> ) | <i>mef2-Gal4; Tub-Gal80<sup>ts</sup></i>                           | Bloomington <i>Drosophila</i> Stock center | Derived from #50742 |                                                    |
| Genetic reagent ( <i>Drosophila melanogaster</i> ) | <i>elav-Gal4; Tub-Gal80<sup>ts</sup></i>                           | Bloomington <i>Drosophila</i> Stock center | Derived from #458   |                                                    |
| Cell line ( <i>Drosophila melanogaster</i> )       | S2R+ cells                                                         | DGRC                                       | RRID:CVCL_Z831      |                                                    |
| Cell line (Human)                                  | HEK293T                                                            | Gift: Adrian Bracken lab                   | N/A                 |                                                    |
| Cell line (Human)                                  | U2OS                                                               | Gift: Martina Schroeder lab                | N/A                 |                                                    |
| Recombinant DNA reagent                            | pUAS <sup>t</sup> -Atx2-SNAP <sub>fly</sub> (Plasmid)              | This paper                                 | N/A                 | Construct to express fly Atx2WT -SNAP              |
| Recombinant DNA reagent                            | pUAS <sup>t</sup> -ATXN2-SNAP <sub>hum</sub> (Plasmid)             | This paper                                 | N/A                 | Construct to express human WT ATXN2-SNAP           |
| Recombinant DNA reagent                            | pUAS <sup>t</sup> -mini-Atx2-SNAP <sub>fly</sub> (Plasmid)         | This paper                                 | N/A                 | Construct to express fly mini Atx2-SNAP            |
| Recombinant DNA reagent                            | pUAS <sup>t</sup> -mini-ATXN2-SNAP <sub>hum</sub> (Plasmid)        | This paper                                 | N/A                 | Construct to express human mini ATXN2-SNAP         |
| Recombinant DNA reagent                            | pUAS <sup>t</sup> -ΔLSm-mini-Atx2-SNAP <sub>fly</sub> (Plasmid)    | This paper                                 | N/A                 | Construct to express fly ΔLSm mini Atx2-SNAP       |
| Recombinant DNA reagent                            | pUAS <sup>t</sup> -ΔLSm-mini-ATXN2-SNAP <sub>hum</sub> (Plasmid)   | This paper                                 | N/A                 | Construct to express human ΔLSm mini ATXN2-SNAP    |
| Recombinant DNA reagent                            | pUAS <sup>t</sup> -ΔLSmAD-mini-Atx2-SNAP <sub>fly</sub> (Plasmid)  | This paper                                 | N/A                 | Construct to express fly ΔLSm-AD mini Atx2-SNAP    |
| Recombinant DNA reagent                            | pUAS <sup>t</sup> -ΔLSmAD-mini-ATXN2-SNAP <sub>hum</sub> (Plasmid) | This paper                                 | N/A                 | Construct to express human ΔLSm-AD mini ATXN2-SNAP |
| Recombinant DNA reagent                            | pUAS <sup>t</sup> -ΔPAM2-mini-Atx2-SNAP <sub>fly</sub> (Plasmid)   | This paper                                 | N/A                 | Construct to express fly ΔPAM2 mini Atx2-SNAP      |
| Recombinant DNA reagent                            | pUAS <sup>t</sup> -ΔPAM2-mini-ATXN2-SNAP <sub>hum</sub> (Plasmid)  | This paper                                 | N/A                 | Construct to express human ΔPAM2 mini ATXN2-SNAP   |

|                         |                                                                               |                            |                |                                                                         |
|-------------------------|-------------------------------------------------------------------------------|----------------------------|----------------|-------------------------------------------------------------------------|
| Recombinant DNA reagent | pUAS <sup>t</sup> -L859A-mini-Atx2-SNAP <sub>fly</sub> (Plasmid)              | This paper                 | N/A            | Construct to express fly PAM2* L859A mini Atx2-SNAP                     |
| Recombinant DNA reagent | pUAS <sup>t</sup> -L914A-mini-ATXN2-SNAP <sub>hum</sub> (Plasmid)             | This paper                 | N/A            | Construct to express human PAM2* L914A mini ATXN2-SNAP                  |
| Recombinant DNA reagent | pUAS <sup>t</sup> -F866A-mini-Atx2-SNAP <sub>fly</sub> (Plasmid)              | This paper                 | N/A            | Construct to express fly PAM2* F866A mini Atx2-SNAP                     |
| Recombinant DNA reagent | pUAS <sup>t</sup> -F921A-mini-ATXN2-SNAP <sub>hum</sub> (Plasmid)             | This paper                 | N/A            | Construct to express human PAM2* F921A mini ATXN2-SNAP                  |
| Recombinant DNA reagent | pUAS <sup>t</sup> -L859A-F866A-mini-Atx2-SNAP <sub>fly</sub> (Plasmid)        | This paper                 | N/A            | Construct to express fly PAM2* L859A and F866A mini Atx2-SNAP           |
| Recombinant DNA reagent | pUAS <sup>t</sup> -L914A-F921A-Q928A-mini-ATXN2-SNAP <sub>hum</sub> (Plasmid) | This paper                 | N/A            | Construct to express human PAM2* L914A, F921A and Q928A mini ATXN2-SNAP |
| Recombinant DNA reagent | pAcman-Atx2-GFP (Fosmid)                                                      | Sudhakaran et al. 2013     | N/A            | Genomic construct to express fly WT Atx2-GFP                            |
| Recombinant DNA reagent | pAcman-ΔLSm-Atx2-GFP (Fosmid)                                                 | This paper                 | N/A            | Genomic construct to express fly ΔLSm Atx2-GFP                          |
| Recombinant DNA reagent | pAcman-ΔPAM2-Atx2-GFP (Fosmid)                                                | This paper                 | N/A            | Genomic construct to express fly ΔPAM2 Atx2-GFP                         |
| Recombinant DNA reagent | pActin-Gal4                                                                   | DGRC                       |                | Actin promoter Gal4 for insect UAS expression                           |
| Recombinant DNA reagent | pCMV-Gal4                                                                     | Addgene                    | #24345         | CMV promoter Gal4 for mammalian UAS expression                          |
| Antibody                | Anti-Atx2 (chicken polyclonal)                                                | Bakthavachalu et al., 2018 | N/A            | IF (1:1000)<br>WB (1:1000)                                              |
| Antibody                | Anti-Caprin (rabbit polyclonal)                                               | Papoulas et al., 2010      | N/A            | IF (1:1000)                                                             |
| Antibody                | Anti-dFMR (mouse monoclonal)                                                  | DSHB                       | # 5A11         | IF (1:1000) deposited to the DSHB by Siomi, H.                          |
| Antibody                | Anti-GFP (chicken polyclonal)                                                 | Abcam                      | Cat# mAb 13970 | IF (1:1000)                                                             |
| Antibody                | Anti-V5 (rabbit polyclonal)                                                   | Santa Cruz Biotechnology   | Cat# sc83849-R | IF (1:1000)<br>WB (1:1000)                                              |
| Antibody                | PABP (rabbit polyclonal serum)                                                | Lee et al. 2017            | N/A            | IF (1:500) WB (1:500)                                                   |
| Antibody                | Me31B (rabbit polyclonal serum)                                               | Lee et al. 2018            | N/A            | IF (1:500)                                                              |
| Antibody                | Rox8 (rat polyclonal)                                                         | Buddika et al. 2020        | N/A            | IF (1:1000)                                                             |
| Antibody                | SNAP (rabbit polyclonal)                                                      | NEB                        | Cat# P9310S    | WB (1:1000)                                                             |
| Antibody                | PABPC1 (rabbit polyclonal)                                                    | Abcam                      | Cat# ab21060   | WB (1:1000)                                                             |
| Antibody                | LSM12 (rabbit anti human polyclonal)                                          | Abcam                      | Cat# ab173292  | WB (1:1000)                                                             |
| Antibody                | G3BP (mouse monoclonal)                                                       | BD Bioscience              | Cat# 611126    | IF (1:1000)                                                             |
| Antibody                | Histone H3 (rabbit polyclonal)                                                | Cell signaling tech        | Cat# 9715      | WB (1:1000)                                                             |
| Antibody                | Baf155 (rabbit monoclonal)                                                    | Cell signaling tech        | Cat# 11956     | WB (1:1000)                                                             |



|                     |                                                       |                        |                                                                                                                                               |               |
|---------------------|-------------------------------------------------------|------------------------|-----------------------------------------------------------------------------------------------------------------------------------------------|---------------|
| Antibody            | HRP Goat anti-rabbit                                  | Invitrogen             | Cat# A16104                                                                                                                                   | WB (1:10,000) |
| Antibody            | HRP Goat anti-mouse                                   | Invitrogen             | Cat# 31430                                                                                                                                    | WB (1:10,000) |
| Antibody            | Alexa Fluor 555<br>(polyclonal goat anti-chicken IgG) | Invitrogen             | Cat# A21437                                                                                                                                   | IF (1:1000)   |
| Antibody            | Alexa Fluor 488<br>(polyclonal goat anti-chicken IgG) | Invitrogen             | Cat# A11039                                                                                                                                   | IF (1:1000)   |
| Antibody            | Alexa Fluor 647<br>(polyclonal goat anti-chicken IgG) | Invitrogen             | Cat# A21449                                                                                                                                   | IF (1:1000)   |
| Antibody            | Alexa Fluor 555<br>(polyclonal goat anti-rabbit IgG)  | Invitrogen             | Cat# A21428                                                                                                                                   | IF (1:1000)   |
| Antibody            | Alexa Fluor 488<br>(polyclonal goat anti-rabbit IgG)  | Invitrogen             | Cat# A11078                                                                                                                                   | IF (1:1000)   |
| Antibody            | Alexa Fluor 647<br>(polyclonal goat anti-rabbit IgG)  | Invitrogen             | Cat# A21244                                                                                                                                   | IF (1:1000)   |
| Antibody            | Alexa Fluor 555<br>(polyclonal goat anti-mouse IgG)   | Invitrogen             | Cat# A21422                                                                                                                                   | IF (1:1000)   |
| Antibody            | Alexa Fluor 488<br>(polyclonal goat anti-mouse IgG)   | Invitrogen             | Cat# A21121                                                                                                                                   | IF (1:1000)   |
| Antibody            | Alexa Fluor 647<br>(polyclonal goat anti-mouse IgG)   | Invitrogen             | Cat# A21235                                                                                                                                   | IF (1:1000)   |
| Chemical compound   | MOWIOL mounting medium                                | Sigma (Merck)          | Cat# 81381                                                                                                                                    |               |
| Chemical compound   | SNAP-TmrStar                                          | New England Biolabs    | Cat# S9105S                                                                                                                                   | IF (1:1000)   |
| Chemical compound   | SNAP-Surface 488                                      | New England Biolabs    | Cat# S9124S                                                                                                                                   | IF (1:1000)   |
| Software, algorithm | TRIBE                                                 | McMahon et al., 2016   | <a href="https://github.com/ro-sbashlab/TRIBE">https://github.com/ro-sbashlab/TRIBE</a>                                                       |               |
| Software, algorithm | STAR v2.5.3                                           | Dobin et al., 2013     | <a href="https://github.com/alexdobin/STAR">https://github.com/alexdobin/STAR</a>                                                             |               |
| Software, algorithm | HTSeq v0.11.2                                         | Anders et al., 2015    | <a href="https://github.com/htseq/htseq">https://github.com/htseq/htseq</a>                                                                   |               |
| Software, algorithm | DESeq2                                                | Love et al., 2014      | <a href="https://bioconductor.org/packages/release/bioc/html/DESeq2.html">https://bioconductor.org/packages/release/bioc/html/DESeq2.html</a> |               |
| Software, algorithm | AREScore                                              | Spasic et al., 2012    | <a href="http://arescore.dkfz.de/arescore.pl">http://arescore.dkfz.de/arescore.pl</a>                                                         |               |
| Software, algorithm | Guitar                                                | Cui et al., 2016       | <a href="https://bioconductor.org/packages/release/bioc/html/Guitar.html">https://bioconductor.org/packages/release/bioc/html/Guitar.html</a> |               |
| Software, algorithm | Bedtools                                              | Quinlan and Hall, 2010 | <a href="https://github.com/arq5x/bedtools2">https://github.com/arq5x/bedtools2</a>                                                           |               |
| Software, algorithm | twoBitToFa                                            | -                      | <a href="https://genome.ucsc.edu/goldenPath/help/twoBit.html">https://genome.ucsc.edu/goldenPath/help/twoBit.html</a>                         |               |
| Software, algorithm | MEME suite                                            | Bailey et al., 2009    | <a href="http://meme-suite.org/tools/meme">http://meme-suite.org/tools/meme</a>                                                               |               |
| Software, algorithm | ImageJ                                                | Schneider et al., 2012 | <a href="https://imagej.nih.gov/ij/">https://imagej.nih.gov/ij/</a>                                                                           |               |

|                     |            |                 |                                                                                                                                       |  |
|---------------------|------------|-----------------|---------------------------------------------------------------------------------------------------------------------------------------|--|
| Software, algorithm | Ggplot2    | Wilkinson, 2011 | <a href="https://github.com/tidyverse/ggplot2">https://github.com/tidyverse/ggplot2</a>                                               |  |
| Software, algorithm | Pheatmap   |                 | <a href="https://cran.r-project.org/web/packages/pheatmap/index.html">https://cran.r-project.org/web/packages/pheatmap/index.html</a> |  |
| Software, algorithm | SnapDragon |                 | <a href="https://www.flyrnai.org/snapdragon">https://www.flyrnai.org/snapdragon</a>                                                   |  |

564

565 Cell culture, transfection and stress induction

566 *Drosophila* S2R+ cells were obtained from the DGRC, Indiana University, and were grown in  
567 Gibco Schneider's S2 media with 10% FBS and 1% penicillin and streptomycin, at 25°C.  
568 Transfections were performed using either FugeneHD (Active Motif) or TransIT-X2 (Mirus)  
569 reagents at 2:1 ratio  $\mu$ l reagent to  $\mu$ g plasmid DNA for 24-72 h depending on downstream use.  
570 HEK293T cells from Adrian Bracken, Trinity College Dublin, were grown in Gibco  
571 Dulbecco's Modified Eagle Media with 10% FBS, 2 mM l-glutamine addition, 1% penicillin  
572 and streptomycin, at 37°C and 5% CO<sub>2</sub>. U2OS cells from Martina Schroeder, Maynooth  
573 University, were grown at the same conditions as HEK293T. Mammalian cell transfections  
574 were carried out with 1 mM PEI (Polysciences) solution at 2:1 ratio  $\mu$ l reagent to  $\mu$ g plasmid  
575 DNA for 24-72H depending on downstream use. For confocal imaging applications cells were  
576 grown in 24-well plates on glass cover-slips for 24 h before transfection for up to 48 h. For  
577 Western blotting and IP, cells were grown in 75 cm<sup>2</sup> flasks until >80% confluent before  
578 transfection for up to 72H before harvesting. Oxidative stress was induced in *Drosophila* S2R+  
579 cells with addition of sodium arsenite solution to a final concentration of 50  $\mu$ M in media for  
580 3 h. In mammalian cells, oxidative stress was induced in the same way except for only 1 h.

581

582 Western blotting and protein immunoprecipitation

583 Total protein extracts were prepared from S2 and HEK293 cells as described earlier  
584 (Sudhakaran et al., 2014). Up to 10  $\mu$ g total protein was loaded per well for detecting Atx2-  
585 SNAP constructs, partner proteins and loading controls on 8-12% SDS-PAGE gels and  
586 transferred to nitrocellulose membranes. The blots were probed in 5% skim milk in PBS using  
587 rabbit anti-SNAP (1:1000), rabbit anti-PABP (1:1000), rabbit anti-LSM12 (1:1000) antibodies,  
588 and mouse anti-histone H3 (1:5000) and mouse anti-BAF155 (1:2000) loading control  
589 antibodies. Corresponding HRP-conjugated secondary antibodies were used at 1:10,000  
590 dilution and developed using Pierce ECL western blotting substrate (ThermoFisher) as per the  
591 manufacturer's instructions.

592 For Atx2-SNAP construct immunoprecipitation, transfected cell lysates were normalised to the  
593 same volume and concentration, 10% of the volume was saved and diluted as an input control,  
594 and Chromotek anti-SNAP-tag conjugated agarose beads and IP kits were used according to  
595 the manufacturer's specifications. Pulled-down proteins together with corresponding sample  
596 input controls were blotted as described above.

597

#### 598 Immunohistochemistry and imaging of cultured cells

599 Transfected cells on coverslips were fixed with 4% paraformaldehyde in PBS solution for 15  
600 min, followed by three 5 min washes in PBS. Permeabilization was performed on all cells with  
601 0.5% TritonX100 in PBS solution for 3 min, before three more 5 min washes in PBS. Cells  
602 were blocked with 3% BSA in PBS for 1 h at room temperature before staining with primary  
603 antibodies at appropriate dilutions in 3% BSA overnight at 4°C. Corresponding fluorescent  
604 secondary antibodies in 3% BSA were used to stain the sample cells for 1 h at room temperature  
605 after primaries were washed off. Where SNAP-tagged proteins were being visualized, SNAP-  
606 ligand TMR-Star (NEB) or SNAP-surface-Alexa488 (NEB) were added at the secondary  
607 antibody staining stage. Following staining and washing, cells were mounted upside-down on  
608 microscopy slides in MOWIOL, allowed to cure for >12 h at 4 °C, and imaged on a Zeiss  
609 LSM880 Airyscan/AiryscanFast confocal microscope with a 20x air objective.

610

#### 611 Bioimage analysis

612 Where relevant, Airyscan images were processed with Zen Black software (Zeiss) with  
613 recommended settings. Confocal microscopy images were analysed using macros within  
614 ImageJ/FIJI and Excel. Quantification of co-localisation was performed by comparing stress  
615 granule marker staining intensity profiles across a randomised selection of Atx2 granules  
616 within transfected cells, with the intensity profile of the Atx2 staining. Any signal 10% or  
617 higher than background (adjusted for fluorophore bleed through) was deemed evidence of co-  
618 localisation within that particular granule. For quantifying the exclusion of mini-Atx2-SNAP  
619 constructs from stress induced granules the Caprin or G3BP1 staining was used as independent  
620 identifier of stress granules and Atx2 profiles were compared to them. 48-120 granules were  
621 quantified in each co-staining (Figure 2), and 28-70 granules were quantified for each construct  
622 transfection (Figure 4).

623

#### 624 Crystal structure threading

625 Threading of the *Drosophila* PAM2 peptide bound to the MLL domain of PABPC1 was  
626 performed using the Swiss-PdbViewer software, based on the human crystal structure of the  
627 complex obtained from PDB, identified as 3KTR (Kozlov et al., 2010)

628

#### 629 Experimental fly crosses

630 *Drosophila* stocks were maintained at 25°C in corn meal agar. Strains homozygous for UAS-  
631 transgenes were crossed with *elav-Gal4* and *tub-Gal80ts* at 18 °C till the adult fly emerged.  
632 The flies were shifted to 29 °C for 5 days before processing for RNA extraction for TRIBE  
633 experiments. The climbing behaviour experiments were performed on flies kept at 29 °C for  
634 either 1 or 15 days. For microCT experiments, the UAS-transgenes were crossed with *mef2-*  
635 *Gal4* and *tub-Gal80ts* at 18°C and the adult flies were transferred to 29 °C for 1 day or 20 days.

636

#### 637 RNA extraction from brain and NGS

638 Around 10-12 adult brains were dissected in RNA Later for total RNA isolation. RNA was  
639 isolated using TRIzol reagent (Invitrogen) as per the manufacturer's protocol. Poly(A)-  
640 enriched mRNA was used to prepare Illumina libraries using the NEBNext Ultra II Directional  
641 RNA Library Prep kit (E7765L). *Atx2-ΔPAM2-ADARcd* samples were sequenced with  
642 Illumina HiSeq PE Rapid Cluster Kit v2 (PE-402-4002) to generate 2 × 100 paired-end strand-  
643 specific data using the Illumina HiSeq 2500 sequencing platform.

644

#### 645 TRIBE data analysis

646 The sequencing reads obtained had a mean quality score (Q-Score)  $\geq 37$ . Analysis of the  
647 TRIBE data was performed as described previously (McMahon et al., 2016, Singh et al., 2021).  
648 Briefly, the reference genome and gtf file of *Drosophila melanogaster*, version dm6, were  
649 downloaded from the UCSC genome browser. Raw sequencing reads were mapped using  
650 TopHat2 (Trapnell *et al*, 2009) with the parameters '--library-type fr-firststrand -m 1 N 3 --  
651 read-edit-dist 3 p 5 g 2 -I 50000 --microexon-search --no-coverage-search -G dm6\_genes.gtf'.  
652 Only uniquely mapped reads are considered for editing analysis. A table of raw and mapped  
653 reads is included in Supplementary Table 1. A threshold file was created by ensuring only edits  
654 with coverage of at least 20 reads and 15% edits were retained. All the TRIBE experiments  
655 were performed in duplicates, and only the edits identified in both replicates above the edit  
656 threshold are reported.

#### 657 Climbing Assay:

658 Appropriately aged adult *Drosophila* was transferred to a 50 ml graduated glass measuring  
659 cylinder for the climbing assay and sealed with a cotton plug. A digital video camera was  
660 positioned to record the vials. The assay was initiated by tapping the cylinder against a foam  
661 pad to collect the flies to the bottom of the cylinder and the flies were allowed to climb the  
662 cylinder with video being recorded for ~30 s. The number of flies that crossed the 20 ml mark  
663 (~5.5cm) was counted over time and the data was plotted against the time using GraphPad  
664 prism. Average of 3 trials were used for each biological replicate. 7-10 biological replicates  
665 were used for each genotype.

666

#### 667 Sample preparation and scanning for microCT:

668 *Drosophila* indirect flight muscle microCT was carried out as described in Chaturvedi et. al,  
669 2019. Briefly, animals were anesthetized on ice and fixed in PBS containing 4%  
670 paraformaldehyde (PFA). Thoraces were dissected and stained using 1% elemental iodine  
671 (1.93900.0121, Emparta, Merck) with 2% potassium iodide (no. 15 724, Qualigens) dissolved  
672 in PBS. The stained samples were washed in PBS and embedded in petroleum jelly. MicroCT  
673 scanning was carried out at 40 kV, 250  $\mu$ A, on Bruker Skyscan-1272.

674

#### 675 Data availability

676 The RNA sequencing data have been deposited to GEO under the accession code  
677 GSE196739.

678

#### 679 Contact for reagent and resource sharing

680 Further information and requests for resources and reagents should be directed to and will be  
681 fulfilled by the lead contacts Mani Ramaswami (mani.ramaswami@tcd.ie) and Baskar  
682 Bakthavachalu (baskar@iitmandi.ac.in).

683

#### 684 **ACKNOWLEDGEMENTS:**

685

686 We thank members of the Ramaswami, Vijay Raghavan and Bakthavachalu labs and Roy  
687 Parker for useful discussions and/or comments on the manuscript. We thank Marlina Mucha,  
688 Adrian Bracken and Amir Khan for advice and help with biochemical experiments, Michael  
689 Rosbash for *Drosophila* TRIBE plasmids, and colleagues acknowledged in the Key Resources  
690 table for reagents and advice. The fly facility at Bangalore Life Science Cluster (BLiSC)

691 provided support with fly stock supply as well as generation of transgenic; CIFF at BLiSC  
692 provided essential confocal microscopy support; and Awadhesh Pandit and next-generation  
693 genomics facility at BLiSC provided NGS service. Daniel Fortunati thanks Kenneth Mok for  
694 his mentorship. We acknowledge Drosophila Genomics Resource Centre (supported by NIH  
695 grant 2P40OC010949) for *Drosophila* S2 cells.

696

#### 697 **FUNDING:**

698 The work was supported by a Science Foundation Ireland (SFI) Investigator grant to MR and  
699 NCBS-TIFR intramural funding to KVR. BB is supported by the DBT/Wellcome Trust India  
700 Alliance Fellowship (IA/I/19/1/504286). We acknowledge the support from an Irish Research  
701 Council Postgraduate Fellowship to DF, the J. C. Bose Fellowship of the Government of India  
702 (KVR), INSA Young Scientist Project (INSA/SP/YSP/143/2017) (AS), SERB to MR from a  
703 collaborative VAJRA award to Dr. Raghu Padinjat, and a DST INSPIRE fellowship (KA). We  
704 thank C-CAMP for logistical support for SSP.

705

#### 706 **AUTHOR CONTRIBUTIONS:**

707 Conceptualization, A.P., D.F, A.S., J.Huelsmeier, K.V.R., M.R., and B.B.; Methodology, A.P.,  
708 D.F, A.S., J.Huelsmeier, A.R.K., S.S.P., J.Hillebrand, K.A., D.J., G.B., J.L., C.L., G.A.,  
709 K.H.M., K.V.R., M.R., and B.B.; Investigation, A.S., J.Huelsmeier, A.R.K., S.S.P.,  
710 J.Hillebrand, A.P., K.A., K.V.R., M.R., and B.B.; Writing–Original Draft, A.P., D.F, A.S.,  
711 J.Huelsmeier, K.V.R., M.R., and B.B.; Writing–Review & Editing, A.P., D.F, A.S.,  
712 J.Huelsmeier, A.R.K., S.S.P., J.Hillebrand, K.A., D.J., G.B., J.L., C.L., G.A., K.H.M., K.V.R.,  
713 M.R., and B.B.; Funding Acquisition, K.V.R., M.R., and B.B.; Resources, Fly community.

714

715 **DECLARATION OF INTERESTS:** The authors declare no conflicts of interest.

716

717

718

719 **SUPPLEMENTARY FIGURES:**

720 **Supplementary Figure 1:**

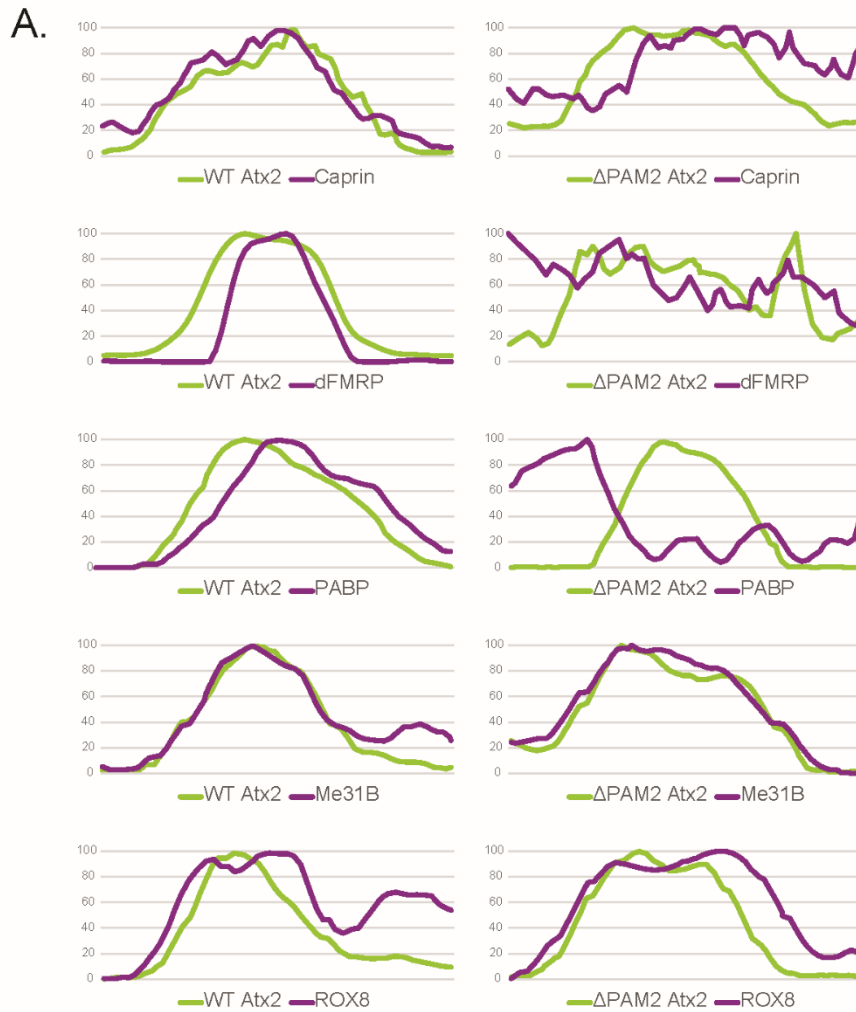

B. Co-localisation of signal enrichment in granules

|        | WT Atx2 | ΔPAM2 Atx2 |
|--------|---------|------------|
| Caprin | 100.0%  | 7.1%       |
| dFMRP  | 100.0%  | 2.4%       |
| PABP   | 76.7%   | 14.6%      |
| Me31B  | 66.7%   | 52.0%      |
| Rox8   | 100%    | 100%       |

C.

| Construct           | <i>Drosophila</i> Mini Atx2-SNAP Version |        |         |       |       |       |         |
|---------------------|------------------------------------------|--------|---------|-------|-------|-------|---------|
|                     | WT                                       | ΔLSm   | ΔLSm-AD | ΔPAM2 | L859A | F866A | Double* |
| % enrichment in SGs | 88.60%                                   | 80.00% | 93.30%  | 4.60% | 0.00% | 0.00% | 0.00%   |
| Construct           | <i>Human</i> Mini Atxn2-SNAP Version     |        |         |       |       |       |         |
|                     | WT                                       | ΔLSm   | ΔLSm-AD | ΔPAM2 | L914A | F921A | Triple* |
| % enrichment in SGs | 100.00%                                  | 96.20% | 100.00% | 4.90% | 0.00% | 5.00% | 4.80%   |

721

722 **Supplementary Figure 1: Co-localisation quantification for figure 2, figure 4. (A)** Normalised

723 profile plots of Atx2-GFP granules in S2 cells as shown in Figure 2. Within representative

724 granules of wild type Atx2-GFP (green line), SG components Caprin, dFMRP, PABP, Me31B,

725 and Rox8 show largely overlapping enrichment of fluorescence profile along a line bisecting a

726 granule after immunohistochemistry and imaging (purple line). In Atx2ΔPAM2-GFP granules,

727 this colocalization of fluorescence signals is not seen in the case of Caprin, dFMRP and PABP,  
728 suggesting these components are not enriched in these granules above background level. (B)  
729 Quantification of co-localization for Figure 2. N = 48-120 images of Atx2-GFP granules were  
730 randomly selected for each co-staining and analysed for signal co-enrichment (see methods) in  
731 the case of each component assayed. (C) Quantification of Atx2 construct inclusion in SGs for  
732 Figure 4. N = 28-70 images of stress granules in arsenite stressed S2 cells (marked by anti-  
733 Caprin staining) and U2OS cells (marked by anti-G3BP staining) were randomly selected for  
734 each Atx2 construct assayed and were analysed for Mini Atx2-SNAP allele signal co-  
735 enrichment (see methods).  
736



737 **Supplementary Figure 2:**

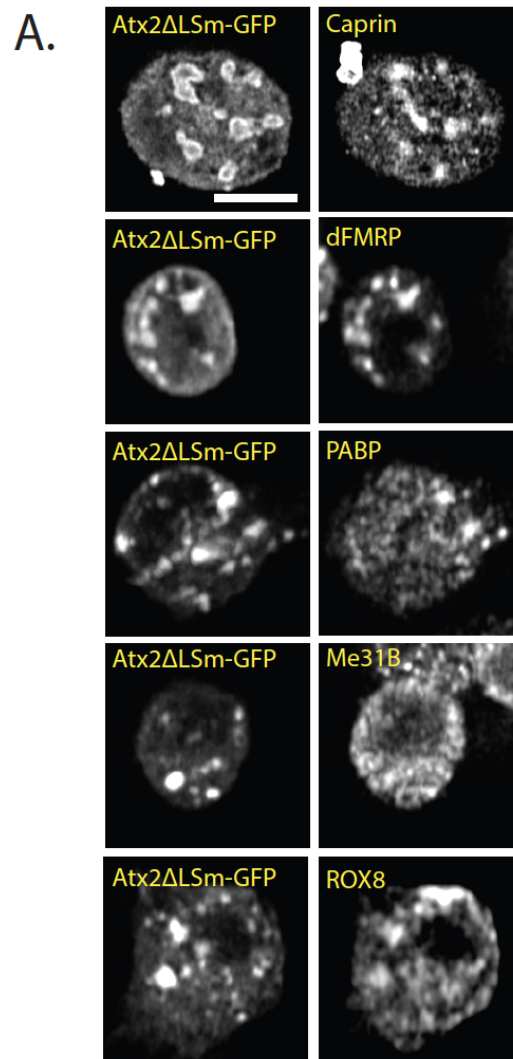

738

739 **Supplementary Figure 2:** Atx2ΔLSm granules in S2 cells do not show significantly altered  
740 protein contents compared to wild-type Atx2. Caprin, dFMRP, PABP, Me31B, and Rox8 co-  
741 localize with overexpressed Atx2ΔLSm GFP, suggesting that the granules formed contain a  
742 similar set of components as Atx2 granules. It should be noted that Atx2 granules do not  
743 sequester the majority of the endogenous components stained for, leading to a high, diffuse  
744 background staining.

745

746 **Supplementary Figure 3:**

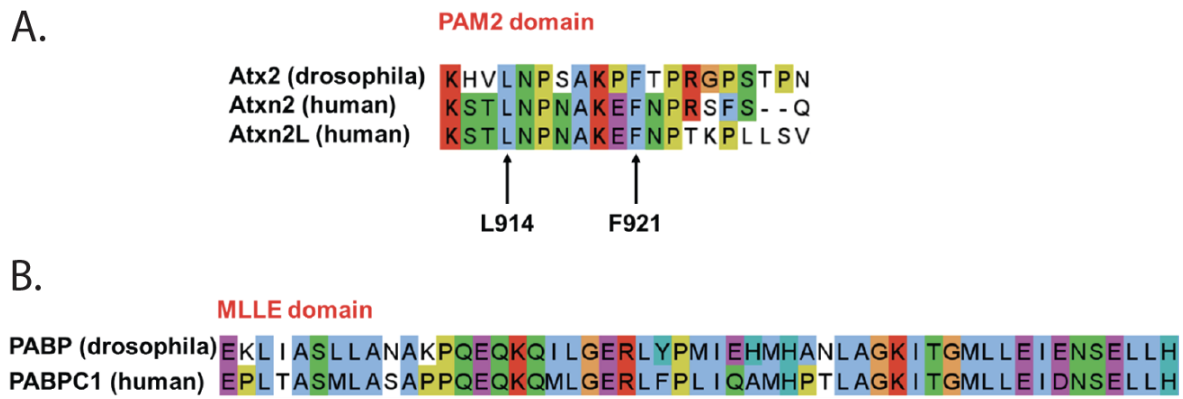

747

748

749 **Supplementary Figure 3:** The ATXN2 PAM2 and the PABPC1 MLLE domain are highly  
 750 conserved from fly to human. (A) The ATXN2 PAM2 domain exhibits high sequence  
 751 similarity where the key MLLE domain hydrophobic binding residues leucine 914 and  
 752 phenylalanine 921 (human ATXN2 numbering) are conserved from *Drosophila* to humans. (B)  
 753 Its binding partner, the PABPC1 MLLE domain, is also highly conserved from *Drosophila* to  
 754 human. Sequence IDs: Q8SWR8 (Atx2\_DROME), Q99700 (ATXN2\_HUMAN), Q8WWM7  
 755 (ATX2L\_HUMAN), P21187 (PABP\_DROME), P11940 (PABP1\_HUMAN).

756

757

758 **Supplementary Figure 4:**

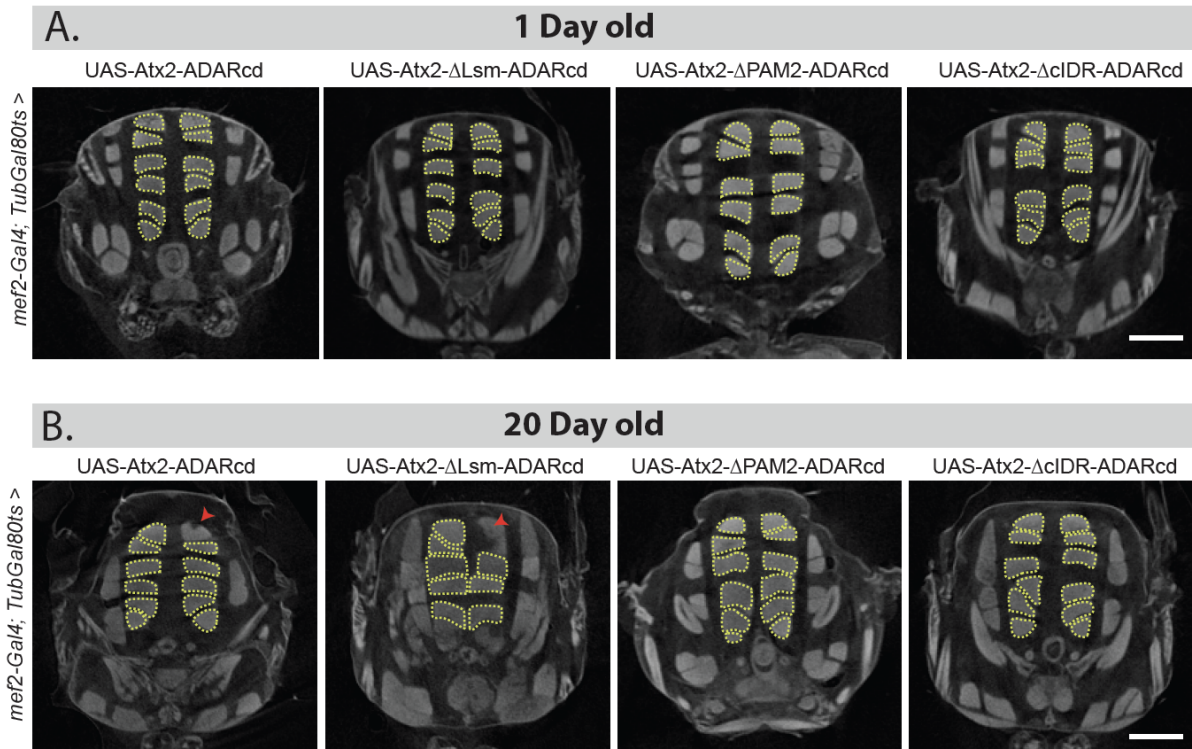

759

760 **Supplementary Figure 4:** Transverse view of *Drosophila* indirect flight muscle imaged using  
761 micro-CT show cellular toxicity. (A) Driving UAS-transgene (Atx2WT, Atx2 $\Delta$ cIDR,  
762 Atx2 $\Delta$ PAM or Atx2 $\Delta$ LSm) with *mef2-Gal4* show normal muscles on day 1. (B) Expression of  
763 wild-type and Atx2 $\Delta$ LSm transgene for 20 days show loss of muscle fibers, indicated with  
764 solid red arrowheads. Expression of Atx2 $\Delta$ PAM2 and Atx2 $\Delta$ cIDR for 20 days show no visible  
765 phenotype.

766

767 **Supplementary Table 1:**

768

| S.NO | Sample Name            | Million reads (Paired end) |        | Total Number of Million reads | % >= Q30 | Mean Quality Score | Mapping Percentage Read 1 | Mapping Percentage Read 2 |
|------|------------------------|----------------------------|--------|-------------------------------|----------|--------------------|---------------------------|---------------------------|
|      |                        | Read 1                     | Read 2 |                               |          |                    |                           |                           |
| 1    | Atx2ΔPAM2-ADARcd rep_1 | 23.75                      | 23.75  | 47                            | 97.04    | 38.26              | 92.20%                    | 92.10%                    |
| 2    | Atx2ΔPAM2-ADARcd rep_2 | 22.66                      | 22.66  | 45                            | 97.03    | 38.26              | 91.30%                    | 91.20%                    |

769

770

771 **Supplementary Table 2: The targets common between Atx2 wild-type and del-PAM2 are**

772 shown in bold text.

773

| Chr          | Start           | End             | Genes            | Replicate 1 edit percentage | Replicate 2 edit percentage | Average edit percentage | Chr coordinate                  |
|--------------|-----------------|-----------------|------------------|-----------------------------|-----------------------------|-------------------------|---------------------------------|
| <b>chr2L</b> | <b>1009080</b>  | <b>1009081</b>  | <b>IA-2</b>      | <b>17.1</b>                 | <b>15.5</b>                 | <b>16.3</b>             | <b>chr2L_1009081_IA-2</b>       |
| <b>chr2L</b> | <b>1009440</b>  | <b>1009441</b>  | <b>IA-2</b>      | <b>31.7</b>                 | <b>38.8</b>                 | <b>35.25</b>            | <b>chr2L_1009441_IA-2</b>       |
| <b>chr2L</b> | <b>1011482</b>  | <b>1011483</b>  | <b>IA-2</b>      | <b>31.7</b>                 | <b>34.7</b>                 | <b>33.2</b>             | <b>chr2L_1011483_IA-2</b>       |
| chr2L        | 13505104        | 13505105        | B4               | 22.4                        | 17.48                       | 19.94                   | chr2L_13505105_B4               |
| <b>chr2L</b> | <b>17188307</b> | <b>17188308</b> | <b>beat-IIIc</b> | <b>18</b>                   | <b>21.7</b>                 | <b>19.85</b>            | <b>chr2L_17188308_beat-IIIc</b> |
| chr2L        | 19746161        | 19746162        | CG10631          | 25.65                       | 19.4                        | 22.52                   | chr2L_19746162_CG10631          |
| <b>chr2L</b> | <b>20056018</b> | <b>20056019</b> | <b>sNPF</b>      | <b>16</b>                   | <b>24.3</b>                 | <b>20.15</b>            | <b>chr2L_20056019_sNPF</b>      |
| chr2L        | 7891375         | 7891376         | Snoo             | 18.5                        | 16.7                        | 17.6                    | chr2L_7891376_Snoo              |
| chr2L        | 8113160         | 8113161         | Bsg              | 17.4                        | 19.05                       | 18.23                   | chr2L_8113161_Bsg               |
| <b>chr2L</b> | <b>8113894</b>  | <b>8113895</b>  | <b>Bsg</b>       | <b>16.82</b>                | <b>28.7</b>                 | <b>22.76</b>            | <b>chr2L_8113895_Bsg</b>        |
| chr2L        | 8116005         | 8116006         | Bsg              | 18.2                        | 27.4                        | 22.8                    | chr2L_8116006_Bsg               |
| chr2L        | 9256901         | 9256902         | Ggamma30A        | 19.5                        | 32.6                        | 26.05                   | chr2L_9256902_Ggamma30A         |
| <b>chr2L</b> | <b>9292530</b>  | <b>9292531</b>  | <b>Ggamma30A</b> | <b>42</b>                   | <b>54.4</b>                 | <b>48.2</b>             | <b>chr2L_9292531_Ggamma30A</b>  |
| <b>chr2L</b> | <b>9292829</b>  | <b>9292830</b>  | <b>Ggamma30A</b> | <b>42.6</b>                 | <b>53.55</b>                | <b>48.08</b>            | <b>chr2L_9292830_Ggamma30A</b>  |
| chr2L        | 9295031         | 9295032         | Ggamma30A        | 23.5                        | 26                          | 24.75                   | chr2L_9295032_Ggamma30A         |
| chr2R        | 12085463        | 12085464        | jeb              | 16                          | 28.4                        | 22.2                    | chr2R_12085464_jeb              |
| <b>chr2R</b> | <b>13513577</b> | <b>13513578</b> | <b>Vmat</b>      | <b>64.2</b>                 | <b>63.9</b>                 | <b>64.05</b>            | <b>chr2R_13513578_Vmat</b>      |
| chr2R        | 13513654        | 13513655        | Vmat             | 27.7                        | 33.45                       | 30.58                   | chr2R_13513655_Vmat             |
| <b>chr2R</b> | <b>13513732</b> | <b>13513733</b> | <b>Vmat</b>      | <b>24</b>                   | <b>29.75</b>                | <b>26.88</b>            | <b>chr2R_13513733_Vmat</b>      |
| <b>chr2R</b> | <b>13513762</b> | <b>13513763</b> | <b>Vmat</b>      | <b>44.55</b>                | <b>47.3</b>                 | <b>45.92</b>            | <b>chr2R_13513763_Vmat</b>      |
| <b>chr2R</b> | <b>13514350</b> | <b>13514351</b> | <b>Vmat</b>      | <b>37.7</b>                 | <b>38.5</b>                 | <b>38.1</b>             | <b>chr2R_13514351_Vmat</b>      |
| chr2R        | 13519080        | 13519081        | Vmat             | 18.1                        | 20.8                        | 19.45                   | chr2R_13519081_Vmat             |
| <b>chr2R</b> | <b>23690701</b> | <b>23690702</b> | <b>Pal2</b>      | <b>17.3</b>                 | <b>17.2</b>                 | <b>17.25</b>            | <b>chr2R_23690702_Pal2</b>      |
| chr2R        | 24213943        | 24213944        | CG30419          | 27.8                        | 22.98                       | 25.39                   | chr2R_24213944_CG30419          |
| chr2R        | 24214234        | 24214235        | CG30419          | 24.2                        | 26.1                        | 25.15                   | chr2R_24214235_CG30419          |
| chr2R        | 24214648        | 24214649        | CG30419          | 16.4                        | 15.9                        | 16.15                   | chr2R_24214649_CG30419          |
| chr2R        | 24215193        | 24215194        | CG30419          | 43.5                        | 29.7                        | 36.6                    | chr2R_24215194_CG30419          |
| chr2R        | 24229341        | 24229342        | CG30419          | 20.8                        | 16.3                        | 18.55                   | chr2R_24229342_CG30419          |
| chr2R        | 6914804         | 6914805         | CG30158          | 16.4                        | 16                          | 16.2                    | chr2R_6914805_CG30158           |
| <b>chr2R</b> | <b>6920815</b>  | <b>6920816</b>  | <b>CG30158</b>   | <b>33.92</b>                | <b>40.48</b>                | <b>37.2</b>             | <b>chr2R_6920816_CG30158</b>    |
| <b>chr2R</b> | <b>6921435</b>  | <b>6921436</b>  | <b>CG30158</b>   | <b>17.5</b>                 | <b>41.9</b>                 | <b>29.7</b>             | <b>chr2R_6921436_CG30158</b>    |
| <b>chr2R</b> | <b>6921976</b>  | <b>6921977</b>  | <b>CG30158</b>   | <b>36</b>                   | <b>40.2</b>                 | <b>38.1</b>             | <b>chr2R_6921977_CG30158</b>    |
| <b>chr2R</b> | <b>7718070</b>  | <b>7718071</b>  | <b>CG18812</b>   | <b>15.9</b>                 | <b>19.7</b>                 | <b>17.8</b>             | <b>chr2R_7718071_CG18812</b>    |

|              |                 |                 |                |              |              |              |                              |
|--------------|-----------------|-----------------|----------------|--------------|--------------|--------------|------------------------------|
| chr2R        | 9473772         | 9473773         | Camta          | 21.75        | 30.18        | 25.96        | chr2R_9473773_Camta          |
| chr2R        | 9479421         | 9479422         | Camta          | 23.1         | 26           | 24.55        | chr2R_9479422_Camta          |
| <b>chr2R</b> | <b>9480019</b>  | <b>9480020</b>  | <b>Camta</b>   | <b>32</b>    | <b>41</b>    | <b>36.5</b>  | <b>chr2R_9480020_Camta</b>   |
| <b>chr2R</b> | <b>9910328</b>  | <b>9910329</b>  | <b>FMRFa</b>   | <b>42.5</b>  | <b>25</b>    | <b>33.75</b> | <b>chr2R_9910329_FMRFa</b>   |
| <b>chr3L</b> | <b>11498209</b> | <b>11498210</b> | <b>chrb</b>    | <b>15.82</b> | <b>20.5</b>  | <b>18.16</b> | <b>chr3L_11498210_chrb</b>   |
| chr3L        | 12267895        | 12267896        | CG32100        | 20           | 16.1         | 18.05        | chr3L_12267896_CG32100       |
| chr3L        | 1504295         | 1504296         | Psa            | 18.6         | 15.9         | 17.25        | chr3L_1504296_Psa            |
| chr3L        | 1521650         | 1521651         | Psa            | 18.5         | 34.6         | 26.55        | chr3L_1521651_Psa            |
| chr3L        | 1543675         | 1543676         | CG7852         | 15.5         | 22           | 18.75        | chr3L_1543676_CG7852         |
| chr3L        | 17062355        | 17062356        | Rbp6           | 15.2         | 18.5         | 16.85        | chr3L_17062356_Rbp6          |
| chr3L        | 17147382        | 17147383        | Rbp6           | 18.23        | 26.62        | 22.42        | chr3L_17147383_Rbp6          |
| <b>chr3L</b> | <b>17345219</b> | <b>17345220</b> | <b>Mip</b>     | <b>29.9</b>  | <b>27.2</b>  | <b>28.55</b> | <b>chr3L_17345220_Mip</b>    |
| <b>chr3L</b> | <b>17345290</b> | <b>17345291</b> | <b>Mip</b>     | <b>17.9</b>  | <b>16.9</b>  | <b>17.4</b>  | <b>chr3L_17345291_Mip</b>    |
| <b>chr3L</b> | <b>19066983</b> | <b>19066984</b> | <b>Mkp3</b>    | <b>18.9</b>  | <b>15.7</b>  | <b>17.3</b>  | <b>chr3L_19066984_Mkp3</b>   |
| chr3L        | 21494821        | 21494822        | Hr78           | 27.1         | 18.4         | 22.75        | chr3L_21494822_Hr78          |
| chr3L        | 21831417        | 21831418        | CG7148         | 15.8         | 28.6         | 22.2         | chr3L_21831418_CG7148        |
| chr3L        | 21930851        | 21930852        | mub            | 15           | 17.2         | 16.1         | chr3L_21930852_mub           |
| chr3L        | 21931110        | 21931111        | mub            | 15.1         | 20.1         | 17.6         | chr3L_21931111_mub           |
| chr3L        | 22061206        | 22061207        | Oct-TyrR       | 15.4         | 16.7         | 16.05        | chr3L_22061207_Oct-TyrR      |
| chr3L        | 22877661        | 22877662        | Chro           | 35.3         | 45.7         | 40.5         | chr3L_22877662_Chro          |
| chr3L        | 23148124        | 23148125        | CG32350        | 27.4         | 35.3         | 31.35        | chr3L_23148125_CG32350       |
| chr3L        | 23747549        | 23747550        | CG17698        | 40.27        | 28.95        | 34.61        | chr3L_23747550_CG17698       |
| chr3L        | 23934990        | 23934991        | CG40470        | 23.5         | 22.05        | 22.77        | chr3L_23934991_CG40470       |
| chr3L        | 3910071         | 3910072         | Eip63F-1       | 20           | 24.5         | 22.25        | chr3L_3910072_Eip63F-1       |
| <b>chr3L</b> | <b>3954338</b>  | <b>3954339</b>  | <b>CG12605</b> | <b>35.2</b>  | <b>40.8</b>  | <b>38</b>    | <b>chr3L_3954339_CG12605</b> |
| <b>chr3L</b> | <b>3954933</b>  | <b>3954934</b>  | <b>CG12605</b> | <b>35.42</b> | <b>51.1</b>  | <b>43.26</b> | <b>chr3L_3954934_CG12605</b> |
| chr3L        | 3957068         | 3957069         | CG12605        | 21.8         | 26.7         | 24.25        | chr3L_3957069_CG12605        |
| chr3L        | 3957671         | 3957672         | CG12605        | 18.9         | 22.2         | 20.55        | chr3L_3957672_CG12605        |
| chr3L        | 3961590         | 3961591         | CG12605        | 18.3         | 18.5         | 18.4         | chr3L_3961591_CG12605        |
| chr3L        | 3992789         | 3992790         | scrt           | 21.08        | 27.28        | 24.18        | chr3L_3992790_scrt           |
| chr3L        | 4092142         | 4092143         | CG14989        | 15.88        | 18.6         | 17.24        | chr3L_4092143_CG14989        |
| chr3L        | 4113123         | 4113124         | Ack            | 18.4         | 16.7         | 17.55        | chr3L_4113124_Ack            |
| chr3L        | 4113297         | 4113298         | Ack            | 18.4         | 17.9         | 18.15        | chr3L_4113298_Ack            |
| chr3L        | 572527          | 572528          | hipk           | 29.8         | 31           | 30.4         | chr3L_572528_hipk            |
| chr3L        | 572530          | 572531          | hipk           | 42.7         | 43           | 42.85        | chr3L_572531_hipk            |
| <b>chr3L</b> | <b>575712</b>   | <b>575713</b>   | <b>hipk</b>    | <b>36.12</b> | <b>52.92</b> | <b>44.52</b> | <b>chr3L_575713_hipk</b>     |
| <b>chr3L</b> | <b>575753</b>   | <b>575754</b>   | <b>hipk</b>    | <b>31.7</b>  | <b>49.6</b>  | <b>40.65</b> | <b>chr3L_575754_hipk</b>     |
| chr3L        | 576730          | 576731          | hipk           | 17.1         | 15.2         | 16.15        | chr3L_576731_hipk            |
| chr3L        | 577020          | 577021          | hipk           | 20           | 16.9         | 18.45        | chr3L_577021_hipk            |
| <b>chr3L</b> | <b>577417</b>   | <b>577418</b>   | <b>hipk</b>    | <b>51.42</b> | <b>62.12</b> | <b>56.77</b> | <b>chr3L_577418_hipk</b>     |
| chr3L        | 577970          | 577971          | hipk           | 21.4         | 25.9         | 23.65        | chr3L_577971_hipk            |
| chr3L        | 578186          | 578187          | hipk           | 18.2         | 24.9         | 21.55        | chr3L_578187_hipk            |
| chr3L        | 578453          | 578454          | hipk           | 25.7         | 32.7         | 29.2         | chr3L_578454_hipk            |
| chr3L        | 579335          | 579336          | hipk           | 18.1         | 17           | 17.55        | chr3L_579336_hipk            |
| chr3L        | 579634          | 579635          | hipk           | 20.5         | 19.8         | 20.15        | chr3L_579635_hipk            |

|              |                 |                 |                |              |              |              |                               |
|--------------|-----------------|-----------------|----------------|--------------|--------------|--------------|-------------------------------|
| <b>chr3L</b> | <b>580103</b>   | <b>580104</b>   | <b>hipk</b>    | <b>63.1</b>  | <b>67.7</b>  | <b>65.4</b>  | <b>chr3L_580104_hipk</b>      |
| chr3L        | 580500          | 580501          | hipk           | 15.6         | 18.1         | 16.85        | chr3L_580501_hipk             |
| chr3L        | 580932          | 580933          | hipk           | 17.9         | 24.1         | 21           | chr3L_580933_hipk             |
| <b>chr3L</b> | <b>8970787</b>  | <b>8970788</b>  | <b>CG5026</b>  | <b>17.9</b>  | <b>16.7</b>  | <b>17.3</b>  | <b>chr3L_8970788_CG5026</b>   |
| chr3L        | 8993382         | 8993383         | smg            | 25.9         | 15.3         | 20.6         | chr3L_8993383_smg             |
| chr3L        | 9074752         | 9074753         | Tequila        | 29.8         | 19.5         | 24.65        | chr3L_9074753_Tequila         |
| <b>chr3L</b> | <b>9103274</b>  | <b>9103275</b>  | <b>bol</b>     | <b>23.9</b>  | <b>26.3</b>  | <b>25.1</b>  | <b>chr3L_9103275_bol</b>      |
| chr3L        | 9136454         | 9136455         | Use1           | 25           | 16           | 20.5         | chr3L_9136455_Use1            |
| chr3L        | 9669496         | 9669497         | fry            | 18.2         | 18.2         | 18.2         | chr3L_9669497_fry             |
| chr3L        | 9945905         | 9945906         | CG34356        | 19.4         | 32.1         | 25.75        | chr3L_9945906_CG34356         |
| chr3R        | 10158991        | 10158992        | Invadolysin    | 17.9         | 18.2         | 18.05        | chr3R_10158992_Invadolysin    |
| chr3R        | 10862820        | 10862821        | CG6574         | 20.8         | 33.3         | 27.05        | chr3R_10862821_CG6574         |
| chr3R        | 10877257        | 10877258        | CR45195        | 32.7         | 19.5         | 26.1         | chr3R_10877258_CR45195        |
| chr3R        | 10889941        | 10889942        | Leash          | 18.2         | 18.8         | 18.5         | chr3R_10889942_Leash          |
| <b>chr3R</b> | <b>13224637</b> | <b>13224638</b> | <b>Ace</b>     | <b>24.8</b>  | <b>33.3</b>  | <b>29.05</b> | <b>chr3R_13224638_Ace</b>     |
| <b>chr3R</b> | <b>13227870</b> | <b>13227871</b> | <b>Ace</b>     | <b>26.6</b>  | <b>35.3</b>  | <b>30.95</b> | <b>chr3R_13227871_Ace</b>     |
| <b>chr3R</b> | <b>13227970</b> | <b>13227971</b> | <b>Ace</b>     | <b>33.42</b> | <b>47.95</b> | <b>40.69</b> | <b>chr3R_13227971_Ace</b>     |
| chr3R        | 14330745        | 14330746        | NK7.1          | 16.2         | 16.7         | 16.45        | chr3R_14330746_NK7.1          |
| chr3R        | 14660839        | 14660840        | Hexim          | 17.1         | 20           | 18.55        | chr3R_14660840_Hexim          |
| chr3R        | 14669984        | 14669985        | Meltrin        | 16.95        | 20.7         | 18.82        | chr3R_14669985_Meltrin        |
| chr3R        | 14746335        | 14746336        | jvl            | 36.4         | 20.9         | 28.65        | chr3R_14746336_jvl            |
| chr3R        | 14746546        | 14746547        | smp-30         | 45.1         | 24           | 34.55        | chr3R_14746547_smp-30         |
| <b>chr3R</b> | <b>14804349</b> | <b>14804350</b> | <b>btsz</b>    | <b>16.5</b>  | <b>26.5</b>  | <b>21.5</b>  | <b>chr3R_14804350_btsz</b>    |
| <b>chr3R</b> | <b>15255687</b> | <b>15255688</b> | <b>CG42404</b> | <b>18.2</b>  | <b>17.6</b>  | <b>17.9</b>  | <b>chr3R_15255688_CG42404</b> |
| chr3R        | 15356475        | 15356476        | Atg4b          | 15.4         | 20.7         | 18.05        | chr3R_15356476_Atg4b          |
| chr3R        | 15414730        | 15414731        | Atx2           | 22.82        | 26.25        | 24.54        | chr3R_15414731_At2            |
| chr3R        | 15414731        | 15414732        | Atx2           | 19           | 22.6         | 20.8         | chr3R_15414732_At2            |
| chr3R        | 15849417        | 15849418        | cv-d           | 18.8         | 22.2         | 20.5         | chr3R_15849418_cv-d           |
| <b>chr3R</b> | <b>16611267</b> | <b>16611268</b> | <b>NPF</b>     | <b>22.98</b> | <b>23.52</b> | <b>23.25</b> | <b>chr3R_16611268_NPF</b>     |
| chr3R        | 16645743        | 16645744        | CG10324        | 26.1         | 35           | 30.55        | chr3R_16645744_CG10324        |
| chr3R        | 17090737        | 17090738        | call           | 25           | 15.4         | 20.2         | chr3R_17090738_call           |
| <b>chr3R</b> | <b>17731884</b> | <b>17731885</b> | <b>Lgr1</b>    | <b>20</b>    | <b>19</b>    | <b>19.5</b>  | <b>chr3R_17731885_Lgr1</b>    |
| chr3R        | 17802763        | 17802764        | CG17806        | 20.7         | 18.8         | 19.75        | chr3R_17802764_CG17806        |
| chr3R        | 19155252        | 19155253        | CG11779        | 15.6         | 19.1         | 17.35        | chr3R_19155253_CG11779        |
| chr3R        | 20783186        | 20783187        | Syp            | 21.1         | 17           | 19.05        | chr3R_20783187_Syp            |
| chr3R        | 20797469        | 20797470        | Syp            | 15.3         | 20           | 17.65        | chr3R_20797470_Syp            |
| chr3R        | 20820785        | 20820786        | CG17271        | 31.2         | 19.75        | 25.48        | chr3R_20820786_CG17271        |
| chr3R        | 20862212        | 20862213        | CG3822         | 17           | 26.3         | 21.65        | chr3R_20862213_CG3822         |
| chr3R        | 20992668        | 20992669        | Calx           | 17.8         | 27.5         | 22.65        | chr3R_20992669_Calx           |
| chr3R        | 21213891        | 21213892        | SNF4Agamma     | 17.2         | 20           | 18.6         | chr3R_21213892_SNF4Agamma     |
| chr3R        | 21354284        | 21354285        | mod(mdg4)      | 15           | 19           | 17           | chr3R_21354285_mod(mdg4)      |
| chr3R        | 21527750        | 21527751        | CG7956         | 30.3         | 26.5         | 28.4         | chr3R_21527751_CG7956         |
| chr3R        | 21625731        | 21625732        | E2f            | 18           | 23.7         | 20.85        | chr3R_21625732_E2f            |
| chr3R        | 23261698        | 23261699        | orb            | 15.2         | 16.1         | 15.65        | chr3R_23261699_orb            |

|              |                 |                 |                |             |             |              |                               |
|--------------|-----------------|-----------------|----------------|-------------|-------------|--------------|-------------------------------|
| chr3R        | 23681818        | 23681819        | eIF-3p66       | 20.4        | 21.5        | 20.95        | chr3R_23681819_eIF-3p66       |
| <b>chr3R</b> | <b>23698883</b> | <b>23698884</b> | <b>prt</b>     | <b>15.4</b> | <b>23.4</b> | <b>19.4</b>  | <b>chr3R_23698884_prt</b>     |
| chr3R        | 23723418        | 23723419        | CG10365        | 16.1        | 21.1        | 18.6         | chr3R_23723419_CG10365        |
| chr3R        | 23732353        | 23732354        | Rpn9           | 20.4        | 16.7        | 18.55        | chr3R_23732354_Rpn9           |
| chr3R        | 24664388        | 24664389        | slo            | 23.1        | 30          | 26.55        | chr3R_24664389_slo            |
| chr3R        | 24802164        | 24802165        | polybromo      | 29.2        | 20.98       | 25.09        | chr3R_24802165_polybromo      |
| chr3R        | 24820485        | 24820486        | Saf-B          | 15          | 22          | 18.5         | chr3R_24820486_Saf-B          |
| chr3R        | 25234647        | 25234648        | CG10420        | 22.2        | 34.5        | 28.35        | chr3R_25234648_CG10420        |
| <b>chr3R</b> | <b>26233920</b> | <b>26233921</b> | <b>CG12290</b> | <b>25.6</b> | <b>18.4</b> | <b>22</b>    | <b>chr3R_26233921_CG12290</b> |
| <b>chr3R</b> | <b>28050111</b> | <b>28050112</b> | <b>CG34362</b> | <b>15.6</b> | <b>25.6</b> | <b>20.6</b>  | <b>chr3R_28050112_CG34362</b> |
| chr3R        | 28838531        | 28838532        | Apc            | 20.4        | 18.8        | 19.6         | chr3R_28838532_Apc            |
| chr3R        | 29659085        | 29659086        | Dop1R2         | 15.8        | 39.5        | 27.65        | chr3R_29659086_Dop1R2         |
| <b>chr3R</b> | <b>29674515</b> | <b>29674516</b> | <b>Bub3</b>    | <b>27.6</b> | <b>17.8</b> | <b>22.7</b>  | <b>chr3R_29674516_Bub3</b>    |
| chr3R        | 31457698        | 31457699        | Gprk2          | 23.5        | 24.5        | 24           | chr3R_31457699_Gprk2          |
| chr3R        | 31841367        | 31841368        | RhoGAP100F     | 17.73       | 19          | 18.37        | chr3R_31841368_RhoGAP100F     |
| <b>chr3R</b> | <b>5811503</b>  | <b>5811504</b>  | <b>CG11000</b> | <b>21.3</b> | <b>32.4</b> | <b>26.85</b> | <b>chr3R_5811504_CG11000</b>  |
| <b>chr3R</b> | <b>5811505</b>  | <b>5811506</b>  | <b>CG11000</b> | <b>20.8</b> | <b>25.7</b> | <b>23.25</b> | <b>chr3R_5811506_CG11000</b>  |
| chr3R        | 7126383         | 7126384         | CG10098        | 18.6        | 19.1        | 18.85        | chr3R_7126384_CG10098         |
| chr3R        | 8244435         | 8244436         | CG18749        | 15.4        | 16.1        | 15.75        | chr3R_8244436_CG18749         |
| chr3R        | 8244435         | 8244436         | CG33722        | 15.4        | 16.1        | 15.75        | chr3R_8244436_CG33722         |
| chr3R        | 9416762         | 9416763         | alpha-Man-II   | 30.8        | 32.3        | 31.55        | chr3R_9416763_alpha-Man-II    |
| chr3R        | 9441505         | 9441506         | ps             | 37.92       | 33.52       | 35.72        | chr3R_9441506_ps              |
| chr3R        | 9471135         | 9471136         | CG16779        | 43.05       | 34.85       | 38.95        | chr3R_9471136_CG16779         |
| chr3R        | 9525979         | 9525980         | CG8176         | 16.2        | 24.4        | 20.3         | chr3R_9525980_CG8176          |
| chr3R        | 9539464         | 9539465         | mura           | 21.75       | 20.05       | 20.9         | chr3R_9539465_mura            |
| chr3R        | 9794186         | 9794187         | CG8516         | 19.4        | 30.8        | 25.1         | chr3R_9794187_CG8516          |
| chr4         | 478956          | 478957          | Asator         | 15.1        | 20          | 17.55        | chr4_478957_Asator            |
| chr4         | 532906          | 532907          | zfh2           | 20          | 19.7        | 19.85        | chr4_532907_zfh2              |
| chr4         | 92946           | 92947           | pan            | 22.5        | 20.8        | 21.65        | chr4_92947_pan                |
| chrX         | 10309093        | 10309094        | alpha-Man-I    | 24.5        | 29          | 26.75        | chrX_10309094_alpha-Man-I     |
| <b>chrX</b>  | <b>12331302</b> | <b>12331303</b> | <b>Ten-a</b>   | <b>34.8</b> | <b>34</b>   | <b>34.4</b>  | <b>chrX_12331303_Ten-a</b>    |
| chrX         | 16075472        | 16075473        | Tob            | 23.68       | 29.32       | 26.5         | chrX_16075473_Tob             |
| chrX         | 16075887        | 16075888        | Tob            | 22.2        | 22          | 22.1         | chrX_16075888_Tob             |
| chrX         | 16075888        | 16075889        | Tob            | 21.6        | 24          | 22.8         | chrX_16075889_Tob             |
| <b>chrX</b>  | <b>16076959</b> | <b>16076960</b> | <b>Tob</b>     | <b>20</b>   | <b>23.3</b> | <b>21.65</b> | <b>chrX_16076960_Tob</b>      |
| chrX         | 16077193        | 16077194        | Tob            | 17.85       | 19.15       | 18.5         | chrX_16077194_Tob             |
| chrX         | 16089317        | 16089318        | Tob            | 15.2        | 16.1        | 15.65        | chrX_16089318_Tob             |
| <b>chrX</b>  | <b>3321068</b>  | <b>3321069</b>  | <b>dnc</b>     | <b>22.7</b> | <b>28.9</b> | <b>25.8</b>  | <b>chrX_3321069_dnc</b>       |
| <b>chrX</b>  | <b>3342369</b>  | <b>3342370</b>  | <b>dnc</b>     | <b>17.4</b> | <b>22.2</b> | <b>19.8</b>  | <b>chrX_3342370_dnc</b>       |
| <b>chrX</b>  | <b>6325433</b>  | <b>6325434</b>  | <b>CG15894</b> | <b>32</b>   | <b>20.8</b> | <b>26.4</b>  | <b>chrX_6325434_CG15894</b>   |
| <b>chrX</b>  | <b>9172798</b>  | <b>9172799</b>  | <b>mei-P26</b> | <b>17.3</b> | <b>23.1</b> | <b>20.2</b>  | <b>chrX_9172799_mei-P26</b>   |
| chrX         | 9179452         | 9179453         | mei-P26        | 17.35       | 22.23       | 19.79        | chrX_9179453_mei-P26          |
| chrX         | 9188891         | 9188892         | mei-P26        | 15.8        | 18.4        | 17.1         | chrX_9188892_mei-P26          |

776 **BIBLIOGRAPHY:**

777

778 Alberti S, Gladfelter A, Mittag T (2019) Considerations and Challenges in Studying Liquid-  
779 Liquid Phase Separation and Biomolecular Condensates. *Cell* 176: 419-434

780

781 Alberti S, Mateju D, Mediani L, Carra S (2017) Granulostasis: Protein Quality Control of RNP  
782 Granules. *Frontiers in Molecular Neuroscience* 10

783

784 Andrusiak MG, Sharifnia P, Lyu X, Wang Z, Dickey AM, Wu Z, Chisholm AD, Jin Y (2019)  
785 Inhibition of Axon Regeneration by Liquid-like TIAR-2 Granules. *Neuron* 104: 290-304.e298

786

787 Ash PEA, Lei S, Shattuck J, Boudeau S, Carlomagno Y, Medalla M, Mashimo BL, Socorro G,  
788 Al-Mohanna LFA, Jiang L *et al* (2021) TIA1 potentiates tau phase separation and promotes  
789 generation of toxic oligomeric tau. *Proceedings of the National Academy of Sciences* 118:  
790 e2014188118

791

792 Azkanaz M, Rodríguez López A, De Boer B, Huiting W, Angrand P-O, Vellenga E, Kampinga  
793 HH, Bergink S, Martens JH, Schuringa JJ *et al* (2019) Protein quality control in the nucleolus  
794 safeguards recovery of epigenetic regulators after heat shock. *eLife* 8

795

796 Babinchak WM, Surewicz WK (2020) Liquid-Liquid Phase Separation and Its Mechanistic  
797 Role in Pathological Protein Aggregation. *Journal of Molecular Biology* 432: 1910-1925

798

799 Bah A, Forman-Kay JD (2016) Modulation of Intrinsically Disordered Protein Function by  
800 Post-translational Modifications. *Journal of Biological Chemistry* 291: 6696-6705

801

802 Bah A, Vernon RM, Siddiqui Z, Krzeminski M, Muhandiram R, Zhao C, Sonenberg N, Kay  
803 LE, Forman-Kay JD (2015) Folding of an intrinsically disordered protein by phosphorylation  
804 as a regulatory switch. *Nature* 519: 106-109

805

806 Bakthavachalu B, Huelsmeier J, Sudhakaran IP, Hillebrand J, Singh A, Petrauskas A,  
807 Thiagarajan D, Sankaranarayanan M, Mizoue L, Anderson EN *et al* (2018) RNP-Granule  
808 Assembly via Ataxin-2 Disordered Domains Is Required for Long-Term Memory and  
809 Neurodegeneration. *Neuron* 98: 754-766.e754

810

811 Becker LA, Huang B, Bieri G, Ma R, Knowles DA, Jafar-Nejad P, Messing J, Kim HJ, Soriano  
812 A, Auburger G *et al* (2017) Therapeutic reduction of ataxin-2 extends lifespan and reduces  
813 pathology in TDP-43 mice. *Nature* 544: 367-371

814

815 Berlow RB, Dyson HJ, Wright PE (2015) Functional advantages of dynamic protein disorder.  
816 *FEBS Lett* 589: 2433-2440

817

818 Bevilacqua PC, Williams AM, Chou H-L, Assmann SM (2022) RNA multimerization as an  
819 organizing force for liquid-liquid phase separation. *RNA* 28: 16-26

820

821 Biogen, 2021. <https://clinicaltrials.gov/ct2/show/NCT04494256>.

822

823 Boeynaems S, Dorone Y, Marian A, Shabardina V, Huang G, Kim G, Sanyal A, Şen N-E,  
824 Docampo R, Ruiz-Trillo I *et al* (2021) Poly(A)-binding protein is an ataxin-2 chaperone that  
825 emulsifies biomolecular condensates. *bioRxiv*: 2021.2008.2023.457426



- 826  
827 Brandmann T, Fakim H, Padamsi Z, Youn JY, Gingras AC, Fabian MR, Jinek M (2018)  
828 Molecular architecture of LSM14 interactions involved in the assembly of mRNA silencing  
829 complexes. *Embo j* 37  
830  
831 Buchan JR (2014) mRNP granules. *RNA Biology* 11: 1019-1030  
832  
833 Calabretta S, Richard S (2015) Emerging Roles of Disordered Sequences in RNA-Binding  
834 Proteins. *Trends Biochem Sci* 40: 662-672  
835  
836 Cao X, Jin X, Liu B (2020) The involvement of stress granules in aging and aging-associated  
837 diseases. *Aging Cell* 19  
838  
839 Chou A, Krukowski K, Jopson T, Zhu PJ, Costa-Mattioli M, Walter P, Rosi S (2017) Inhibition  
840 of the integrated stress response reverses cognitive deficits after traumatic brain injury. *Proc*  
841 *Natl Acad Sci U S A* 114: E6420-e6426  
842  
843 Cirulli ET, Lasseigne BN, Petrovski S, Sapp PC, Dion PA, Leblond CS, Couthouis J, Lu YF,  
844 Wang Q, Krueger BJ *et al* (2015) Exome sequencing in amyotrophic lateral sclerosis identifies  
845 risk genes and pathways. *Science* 347: 1436-1441  
846  
847 Couthouis J, Hart MP, Erion R, King OD, Diaz Z, Nakaya T, Ibrahim F, Kim H-J, Mojsilovic-  
848 Petrovic J, Panossian S *et al* (2012) Evaluating the role of the FUS/TLS-related gene EWSR1  
849 in amyotrophic lateral sclerosis. *Human Molecular Genetics* 21: 2899-2911  
850  
851 Damrath E, Heck MV, Gispert S, Azizov M, Nowock J, Seifried C, Rüb U, Walter M, Auburger  
852 G (2012) ATXN2-CAG42 Sequesters PABPC1 into Insolubility and Induces FBXW8 in  
853 Cerebellum of Old Ataxic Knock-In Mice. *PLoS Genetics* 8: e1002920  
854  
855 De Graeve F, Besse F (2018) Neuronal RNP granules: from physiological to pathological  
856 assemblies. *Biological Chemistry* 399: 623-635  
857  
858 Decker CJ, Teixeira D, Parker R (2007) Edc3p and a glutamine/asparagine-rich domain of  
859 Lsm4p function in processing body assembly in *Saccharomyces cerevisiae*. *J Cell Biol* 179:  
860 437-449  
861  
862 Deo RC, Bonanno JB, Sonenberg N, Burley SK (1999) Recognition of Polyadenylate RNA by  
863 the Poly(A)-Binding Protein. *Cell* 98: 835-845  
864  
865 Elden AC, Kim HJ, Hart MP, Chen-Plotkin AS, Johnson BS, Fang X, Armarkola M, Geser F,  
866 Greene R, Lu MM *et al* (2010) Ataxin-2 intermediate-length polyglutamine expansions are  
867 associated with increased risk for ALS. *Nature* 466: 1069-1075  
868  
869 Formicola N, Vijayakumar J, Besse F (2019) Neuronal ribonucleoprotein granules: Dynamic  
870 sensors of localized signals. *Traffic* 20: 639-649  
871  
872 Gilks N, Kedersha N, Ayodele M, Shen L, Stoecklin G, Dember LM, Anderson P (2004) Stress  
873 granule assembly is mediated by prion-like aggregation of TIA-1. *Mol Biol Cell* 15: 5383-5398

- 874 Ginsberg SD, Galvin JE, Chiu TS, Lee VM, Masliah E, Trojanowski JQ (1998) RNA  
875 sequestration to pathological lesions of neurodegenerative diseases. *Acta Neuropathol* 96: 487-  
876 494  
877
- 878 Gomes E, Shorter J (2019) The molecular language of membraneless organelles. *J Biol Chem*  
879 294: 7115-7127  
880
- 881 Hachet O, Ephrussi A (2004) Splicing of oskar RNA in the nucleus is coupled to its cytoplasmic  
882 localization. *Nature* 428: 959-963  
883
- 884 Halliday M, Radford H, Zents KAM, Molloy C, Moreno JA, Verity NC, Smith E, Ortori CA,  
885 Barrett DA, Bushell M *et al* (2017) Repurposed drugs targeting eIF2 $\alpha$ -P-mediated translational  
886 repression prevent neurodegeneration in mice. *Brain* 140: 1768-1783  
887
- 888 Han TW, Kato M, Xie S, Wu LC, Mirzaei H, Pei J, Chen M, Xie Y, Allen J, Xiao G *et al*  
889 (2012) Cell-free formation of RNA granules: bound RNAs identify features and components  
890 of cellular assemblies. *Cell* 149: 768-779  
891
- 892 Harlen KM, Churchman LS (2017) The code and beyond: transcription regulation by the RNA  
893 polymerase II carboxy-terminal domain. *Nature Reviews Molecular Cell Biology* 18: 263-273  
894
- 895 Hetz C, Zhang K, Kaufman RJ (2020) Mechanisms, regulation and functions of the unfolded  
896 protein response. *Nature Reviews Molecular Cell Biology* 21: 421-438  
897
- 898 Hochberg-Laufer H, Schwed-Gross A, Neugebauer KM, Shav-Tal Y (2019) Uncoupling of  
899 nucleo-cytoplasmic RNA export and localization during stress. *Nucleic Acids Research* 47:  
900 4778-4797  
901
- 902 Hofweber M, Dormann D (2019) Friend or foe—Post-translational modifications as regulators  
903 of phase separation and RNP granule dynamics. *Journal of Biological Chemistry* 294: 7137-  
904 7150  
905
- 906 Huelsmeier J, Walker E, Bakthavachalu B, Ramaswami M (2021) A C-terminal ataxin-2  
907 disordered region promotes Huntingtin protein aggregation and neurodegeneration in  
908 *Drosophila* models of Huntington's disease. *G3 (Bethesda)* 11  
909
- 910 Hyman AA, Weber CA, Jülicher F (2014) Liquid-Liquid Phase Separation in Biology. *Annual*  
911 *Review of Cell and Developmental Biology* 30: 39-58  
912
- 913 Inagaki H, Hosoda N, Tsuiji H, Hoshino S-I (2020) Direct evidence that Ataxin-2 is a  
914 translational activator mediating cytoplasmic polyadenylation. *Journal of Biological*  
915 *Chemistry* 295: 15810-15825  
916
- 917 Ivanov P, Kedersha N, Anderson P (2019) Stress Granules and Processing Bodies in  
918 Translational Control. *Cold Spring Harb Perspect Biol* 11  
919
- 920 Jain A, Vale RD (2017) RNA phase transitions in repeat expansion disorders. *Nature* 546: 243-  
921 247  
922

- 923 Järvelin AI, Noerenberg M, Davis I, Castello A (2016) The new (dis)order in RNA regulation.  
924 *Cell Commun Signal* 14: 9  
925
- 926 Jiang S, Fagman JB, Chen C, Alberti S, Liu B (2020) Protein phase separation and its role in  
927 tumorigenesis. *eLife* 9  
928
- 929 Jiménez-López D, Guzmán P (2014) Insights into the evolution and domain structure of ataxin-  
930 2 proteins across eukaryotes. *BMC Research Notes* 7: 453  
931
- 932 Kaehler C, Isensee J, Nonhoff U, Terrey M, Hucho T, Lehrach H, Krobitch S (2012) Ataxin-  
933 2-like is a regulator of stress granules and processing bodies. *PLoS One* 7: e50134  
934
- 935 Kato M, Han TW, Xie S, Shi K, Du X, Wu LC, Mirzaei H, Goldsmith EJ, Longgood J, Pei J  
936 *et al* (2012) Cell-free formation of RNA granules: low complexity sequence domains form  
937 dynamic fibers within hydrogels. *Cell* 149: 753-767  
938
- 939 Kedersha N, Anderson P (2007) Mammalian stress granules and processing bodies. *Methods*  
940 *Enzymol* 431: 61-81  
941
- 942 Kedersha N, Panas MD, Achorn CA, Lyons S, Tisdale S, Hickman T, Thomas M, Lieberman  
943 J, McInerney GM, Ivanov P *et al* (2016) G3BP-Caprin1-USP10 complexes mediate stress  
944 granule condensation and associate with 40S subunits. *J Cell Biol* 212: 845-860  
945
- 946 Kedersha NL, Gupta M, Li W, Miller I, Anderson P (1999) RNA-Binding Proteins Tia-1 and  
947 Tiar Link the Phosphorylation of Eif-2 $\alpha$  to the Assembly of Mammalian Stress Granules.  
948 *Journal of Cell Biology* 147: 1431-1442  
949
- 950 Khong A, Parker R (2020) The landscape of eukaryotic mRNPs. *RNA* 26: 229-239  
951
- 952 Kiebler MA, Bassell GJ (2006) Neuronal RNA granules: movers and makers. *Neuron* 51: 685-  
953 690  
954
- 955 Kim G, Gautier O, Tassoni-Tsuchida E, Ma XR, Gitler AD (2020) ALS Genetics: Gains,  
956 Losses, and Implications for Future Therapies. *Neuron* 108: 822-842  
957
- 958 Kim H-J, Raphael AR, Ladow ES, Mcgurk L, Weber RA, Trojanowski JQ, Lee VM-Y,  
959 Finkbeiner S, Gitler AD, Bonini NM (2014) Therapeutic modulation of eIF2 $\alpha$  phosphorylation  
960 rescues TDP-43 toxicity in amyotrophic lateral sclerosis disease models. *Nature Genetics* 46:  
961 152-160  
962
- 963 Kim HJ, Kim NC, Wang YD, Scarborough EA, Moore J, Diaz Z, MacLea KS, Freibaum B, Li  
964 S, Molliex A *et al* (2013) Mutations in prion-like domains in hnRNPA2B1 and hnRNPA1  
965 cause multisystem proteinopathy and ALS. *Nature* 495: 467-473  
966
- 967 Kim TH, Payliss BJ, Nosella ML, Lee ITW, Toyama Y, Forman-Kay JD, Kay LE (2021)  
968 Interaction hot spots for phase separation revealed by NMR studies of a CAPRIN1 condensed  
969 phase. *Proc Natl Acad Sci U S A* 118  
970
- 971 Knowles RB, Sabry JH, Martone ME, Deerinck TJ, Ellisman MH, Bassell GJ, Kosik KS (1996)  
972 Translocation of RNA Granules in Living Neurons. *The Journal of Neuroscience* 16: 7812

- 973  
974 Kozlov G, Safaei N, Rosenauer A, Gehring K (2010) Structural basis of binding of P-body-  
975 associated proteins GW182 and ataxin-2 by the Mlle domain of poly(A)-binding protein. *J Biol*  
976 *Chem* 285: 13599-13606  
977  
978 Kwon I, Kato M, Xiang S, Wu L, Theodoropoulos P, Mirzaei H, Han T, Xie S, Corden Jeffrey L,  
979 McKnight Steven L (2013) Phosphorylation-Regulated Binding of RNA Polymerase II to  
980 Fibrous Polymers of Low-Complexity Domains. *Cell* 155: 1049-1060  
981  
982 Latonen L (2019) Phase-to-Phase With Nucleoli – Stress Responses, Protein Aggregation and  
983 Novel Roles of RNA. *Frontiers in Cellular Neuroscience* 13: 151  
984  
985 Lee J, Yoo E, Lee H, Park K, Hur JH, Lim C (2017) LSM12 and ME31B/DDX6 Define  
986 Distinct Modes of Posttranscriptional Regulation by ATAXIN-2 Protein Complex in  
987 *Drosophila* Circadian Pacemaker Neurons. *Mol Cell* 66: 129-140.e127  
988  
989 Lee KH, Zhang P, Kim HJ, Mitrea DM, Sarkar M, Freibaum BD, Cika J, Coughlin M, Messing  
990 J, Molliex A *et al* (2016) C9orf72 Dipeptide Repeats Impair the Assembly, Dynamics, and  
991 Function of Membrane-Less Organelles. *Cell* 167: 774-788.e717  
992  
993 Li YR, King OD, Shorter J, Gitler AD (2013) Stress granules as crucibles of ALS pathogenesis.  
994 *J Cell Biol* 201: 361-372  
995  
996 Lim C, Allada R (2013) ATAXIN-2 activates PERIOD translation to sustain circadian rhythms  
997 in *Drosophila*. *Science* 340: 875-879  
998  
999 Lin Y, Currie SL, Rosen MK (2017) Intrinsically disordered sequences enable modulation of  
1000 protein phase separation through distributed tyrosine motifs. *J Biol Chem* 292: 19110-19120  
1001  
1002 Lin Y, Protter SW, David, Rosen K, Michael, Parker R (2015) Formation and Maturation of  
1003 Phase-Separated Liquid Droplets by RNA-Binding Proteins. *Molecular Cell* 60: 208-219  
1004  
1005 Liu EY, Cali CP, Lee EB (2017) RNA metabolism in neurodegenerative disease. *Dis Model*  
1006 *Mech* 10: 509-518  
1007  
1008 Machida K, Shigeta T, Yamamoto Y, Ito T, Svitkin Y, Sonenberg N, Imataka H (2018)  
1009 Dynamic interaction of poly(A)-binding protein with the ribosome. *Scientific Reports* 8: 17435  
1010 Mallucci GR, Klenerman D, Rubinsztein DC (2020) Developing Therapies for  
1011 Neurodegenerative Disorders: Insights from Protein Aggregation and Cellular Stress  
1012 Responses. *Annual Review of Cell and Developmental Biology* 36: 165-189  
1013  
1014 Mandrioli J, Mediani L, Alberti S, Carra S (2020) ALS and FTD: Where RNA metabolism  
1015 meets protein quality control. *Semin Cell Dev Biol* 99: 183-192  
1016  
1017 Mangus DA, Evans MC, Jacobson A (2003) Poly(A)-binding proteins: multifunctional  
1018 scaffolds for the post-transcriptional control of gene expression. *Genome Biol* 4: 223  
1019  
1020 Maniatis T, Reed R (2002) An extensive network of coupling among gene expression  
1021 machines. *Nature* 416: 499-506  
1022

- 1023 Martin KC, Ephrussi A (2009) mRNA localization: gene expression in the spatial dimension.  
1024 *Cell* 136: 719-730  
1025
- 1026 Matheny T, Van Treeck B, Huynh TN, Parker R (2021) RNA partitioning into stress granules  
1027 is based on the summation of multiple interactions. *RNA* 27: 174-189  
1028
- 1029 McCann C, Holohan EE, Das S, Dervan A, Larkin A, Lee JA, Rodrigues V, Parker R,  
1030 Ramaswami M (2011) The Ataxin-2 protein is required for microRNA function and synapse-  
1031 specific long-term olfactory habituation. *Proc Natl Acad Sci U S A* 108: E655-662  
1032
- 1033 McMahan AC, Rahman R, Jin H, Shen JL, Fieldsend A, Luo W, Rosbash M (2016) TRIBE:  
1034 Hijacking an RNA-Editing Enzyme to Identify Cell-Specific Targets of RNA-Binding  
1035 Proteins. *Cell* 165: 742-753  
1036
- 1037 Murray DT, Kato M, Lin Y, Thurber KR, Hung I, McKnight SL, Tycko R (2017) Structure of  
1038 FUS Protein Fibrils and Its Relevance to Self-Assembly and Phase Separation of Low-  
1039 Complexity Domains. *Cell* 171: 615-627.e616  
1040
- 1041 Murthy AC, Dignon GL, Kan Y, Zerze GH, Parekh SH, Mittal J, Fawzi NL (2019) Molecular  
1042 interactions underlying liquid–liquid phase separation of the FUS low-complexity domain.  
1043 *Nature Structural & Molecular Biology* 26: 637-648  
1044
- 1045 Nonhoff U, Ralser M, Welzel F, Piccini I, Balzereit D, Yaspo ML, Lehrach H, Krobisch S  
1046 (2007) Ataxin-2 interacts with the DEAD/H-box RNA helicase DDX6 and interferes with P-  
1047 bodies and stress granules. *Mol Biol Cell* 18: 1385-1396  
1048
- 1049 Patel A, Lee HO, Jawerth L, Maharana S, Jahnelt M, Hein MY, Stoyanov S, Mahamid J, Saha  
1050 S, Franzmann TM *et al* (2015) A Liquid-to-Solid Phase Transition of the ALS Protein FUS  
1051 Accelerated by Disease Mutation. *Cell* 162: 1066-1077  
1052
- 1053 Preissler S, Ron D (2019) Early Events in the Endoplasmic Reticulum Unfolded Protein  
1054 Response. *Cold Spring Harb Perspect Biol* 11  
1055
- 1056 Protter DSW, Parker R (2016) Principles and Properties of Stress Granules. *Trends Cell Biol*  
1057 26: 668-679  
1058
- 1059 Protter DSW, Rao BS, Van Treeck B, Lin Y, Mizoue L, Rosen MK, Parker R (2018)  
1060 Intrinsically Disordered Regions Can Contribute Promiscuous Interactions to RNP Granule  
1061 Assembly. *Cell Rep* 22: 1401-1412  
1062
- 1063 Ramaswami M, Taylor JP, Parker R (2013) Altered ribostasis: RNA-protein granules in  
1064 degenerative disorders. *Cell* 154: 727-736  
1065
- 1066 Rayman JB, Karl KA, Kandel ER (2018) TIA-1 Self-Multimerization, Phase Separation, and  
1067 Recruitment into Stress Granules Are Dynamically Regulated by Zn<sup>2+</sup>. *Cell Reports* 22: 59-  
1068 71  
1069
- 1070 Saito M, Hess D, Eglinger J, Fritsch AW, Kreysing M, Weinert BT, Choudhary C, Matthias P  
1071 (2019) Acetylation of intrinsically disordered regions regulates phase separation. *Nat Chem*  
1072 *Biol* 15: 51-61

1073  
1074 Satterfield TF, Pallanck LJ (2006) Ataxin-2 and its Drosophila homolog, ATX2, physically  
1075 assemble with polyribosomes. *Hum Mol Genet* 15: 2523-2532  
1076  
1077 Schuller AP, Wojtynek M, Mankus D, Tatli M, Kronenberg-Tenga R, Regmi SG, Dip PV,  
1078 Lytton-Jean AKR, Brignole EJ, Dasso M *et al* (2021) The cellular environment shapes the  
1079 nuclear pore complex architecture. *Nature* 598: 667-671  
1080  
1081 Scoles DR, Meera P, Schneider MD, Paul S, Dansithong W, Figueroa KP, Hung G, Rigo F,  
1082 Bennett CF, Otis TS *et al* (2017) Antisense oligonucleotide therapy for spinocerebellar ataxia  
1083 type 2. *Nature* 544: 362-366  
1084  
1085 Shin Y, Brangwynne CP (2017) Liquid phase condensation in cell physiology and disease.  
1086 *Science* 357  
1087  
1088 Shulman JM, Feany MB (2003) Genetic Modifiers of Tauopathy in Drosophila. *Genetics* 165:  
1089 1233-1242  
1090  
1091 Sidrauski C, Mcgeachy AM, Ingolia NT, Walter P (2015) The small molecule ISRIB reverses  
1092 the effects of eIF2 $\alpha$  phosphorylation on translation and stress granule assembly. *eLife* 4  
1093  
1094 Singh A, Hulsmeier J, Kandi AR, Pothapragada SS, Hillebrand J, Petrauskas A, Agrawal K,  
1095 Rt K, Thiagarajan D, Jayaprakashappa D *et al* (2021) Antagonistic roles for Ataxin-2 structured  
1096 and disordered domains in RNP condensation. *eLife* 10  
1097  
1098 Strome S, Wood WB (1982) Immunofluorescence visualization of germ-line-specific  
1099 cytoplasmic granules in embryos, larvae, and adults of *Caenorhabditis elegans*. *Proc Natl Acad*  
1100 *Sci U S A* 79: 1558-1562  
1101  
1102 Sudhakaran IP, Hillebrand J, Dervan A, Das S, Holohan EE, Hulsmeier J, Sarov M, Parker R,  
1103 VijayRaghavan K, Ramaswami M (2014) FMRP and Ataxin-2 function together in long-term  
1104 olfactory habituation and neuronal translational control. *Proc Natl Acad Sci U S A* 111: E99-  
1105 E108  
1106  
1107 Taylor JP, Brown RH, Cleveland DW (2016) Decoding ALS: from genes to mechanism.  
1108 *Nature* 539: 197-206  
1109  
1110 Tillotson R, Selfridge J, Koerner MV, Gadalla KKE, Guy J, De Sousa D, Hector RD, Cobb  
1111 SR, Bird A (2017) Radically truncated MeCP2 rescues Rett syndrome-like neurological  
1112 defects. *Nature* 550: 398-401  
1113  
1114 Toretsky JA, Wright PE (2014) Assemblages: functional units formed by cellular phase  
1115 separation. *J Cell Biol* 206: 579-588  
1116  
1117 Trapnell C, Pachter L, Salzberg SL (2009) TopHat: discovering splice junctions with RNA-  
1118 Seq. *Bioinformatics* 25: 1105-1111  
1119  
1120 Van Treeck B, Parker R (2018) Emerging Roles for Intermolecular RNA-RNA Interactions in  
1121 RNP Assemblies. *Cell* 174: 791-802  
1122

- 1123 Van Treeck B, Protter DSW, Matheny T, Khong A, Link CD, Parker R (2018) RNA self-  
1124 assembly contributes to stress granule formation and defining the stress granule transcriptome.  
1125 *Proc Natl Acad Sci U S A* 115: 2734-2739  
1126
- 1127 Vogler TO, Wheeler JR, Nguyen ED, Hughes MP, Britson KA, Lester E, Rao B, Betta ND,  
1128 Whitney ON, Ewachiw TE *et al* (2018) TDP-43 and RNA form amyloid-like myo-granules in  
1129 regenerating muscle. *Nature* 563: 508-513  
1130
- 1131 Wang F, Li J, Fan S, Jin Z, Huang C (2020) Targeting stress granules: A novel therapeutic  
1132 strategy for human diseases. *Pharmacological Research* 161: 105143  
1133
- 1134 Wheeler JR, Matheny T, Jain S, Abrisch R, Parker R (2016) Distinct stages in stress granule  
1135 assembly and disassembly. *eLife* 5  
1136
- 1137 Wolozin B, Ivanov P (2019) Stress granules and neurodegeneration. *Nature Reviews*  
1138 *Neuroscience* 20: 649-666  
1139
- 1140 Wong YL, Lebon L, Edalji R, Lim HB, Sun C, Sidrauski C (2018) The small molecule ISRIB  
1141 rescues the stability and activity of Vanishing White Matter Disease eIF2B mutant complexes.  
1142 *eLife* 7  
1143
- 1144 Xie J, Kozlov G, Gehring K (2014) The "tale" of poly(A) binding protein: the MLLLE domain  
1145 and PAM2-containing proteins. *Biochim Biophys Acta* 1839: 1062-1068  
1146
- 1147 Yang P, Mathieu C, Kolaitis RM, Zhang P, Messing J, Yurtsever U, Yang Z, Wu J, Li Y, Pan  
1148 Q *et al* (2020) G3BP1 Is a Tunable Switch that Triggers Phase Separation to Assemble Stress  
1149 Granules. *Cell* 181: 325-345.e328  
1150
- 1151 Yi H, Park J, Ha M, Lim J, Chang H, Kim VN (2018) PABP Cooperates with the CCR4-NOT  
1152 Complex to Promote mRNA Deadenylation and Block Precocious Decay. *Mol Cell* 70: 1081-  
1153 1088.e1085  
1154
- 1155 Yokoshi M, Li Q, Yamamoto M, Okada H, Suzuki Y, Kawahara Y (2014) Direct binding of  
1156 Ataxin-2 to distinct elements in 3' UTRs promotes mRNA stability and protein expression. *Mol*  
1157 *Cell* 55: 186-198  
1158
- 1159 Yoshida M, Yoshida K, Kozlov G, Lim NS, De Crescenzo G, Pang Z, Berlanga JJ, Kahvejian  
1160 A, Gehring K, Wing SS *et al* (2006) Poly(A) binding protein (PABP) homeostasis is mediated  
1161 by the stability of its inhibitor, Paip2. *The EMBO Journal* 25: 1934-1944  
1162
- 1163 Youn JY, Dyakov BJA, Zhang J, Knight JDR, Vernon RM, Forman-Kay JD, Gingras AC  
1164 (2019) Properties of Stress Granule and P-Body Proteomes. *Mol Cell* 76: 286-294  
1165
- 1166 Zhang K, Daigle JG, Cunningham KM, Coyne AN, Ruan K, Grima JC, Bowen KE, Wadhwa  
1167 H, Yang P, Rigo F *et al* (2018) Stress Granule Assembly Disrupts Nucleocytoplasmic  
1168 Transport. *Cell* 173: 958-971.e917  
1169
- 1170 Zhang Y, Ling J, Yuan C, Dubruille R, Emery P (2013) A role for Drosophila ATX2 in  
1171 activation of PER translation and circadian behavior. *Science* 340: 879-882  
1172

1173 Zyryanova AF, Kashiwagi K, Rato C, Harding HP, Crespillo-Casado A, Perera LA, Sakamoto  
1174 A, Nishimoto M, Yonemochi M, Shirouzu M *et al* (2021) ISRIB Blunts the Integrated Stress  
1175 Response by Allosterically Antagonising the Inhibitory Effect of Phosphorylated eIF2 on  
1176 eIF2B. *Mol Cell* 81: 88-103.e106  
1177
